# Supplementary material for: RNA m6A Methylation Regulators Subclassify Luminal Subtype in Breast Cancer
Source: Front Oncol. 2021 Jan 29;10:611191. doi: 10.3389/fonc.2020.611191 (PMC7878528; doi:10.3389/fonc.2020.611191)
Supplement: Supplementary file 2 [file Table_7.xlsx]

## Sheet: sheet1
Table S7: Significantly differentially expressed gene in cluster1 and cluster2 samples within luminal A subtype with criteria of |log2FoldChange| > 0.58 & padj < 0.05
	baseMean	log2FoldChange	lfcSE	stat	pvalue	padj
HIF3A	24.7087	2.12546	0.261015	8.14305	3.85435e-16	2.26558e-13
TSKS	1.49537	1.08025	0.280847	3.8464	0.000119865	0.000955378
HMGCLL1	39.23	-1.02651	0.231491	-4.43437	9.23434e-06	0.000112615
LRRTM3	0.867557	2.36057	0.670531	3.52045	0.000430809	0.00276905
ITGA7	452.825	1.49112	0.17759	8.39641	4.60318e-17	4.68674e-14
CHST4	3.14257	1.67341	0.243609	6.86925	6.45409e-12	6.41204e-10
ZNF703	1261.47	-1.24567	0.148429	-8.39235	4.76512e-17	4.68674e-14
TMPRSS11D	2.67275	-1.78065	0.495414	-3.59426	0.000325313	0.00221197
HRH3	0.882376	-1.27807	0.517129	-2.47148	0.0134557	0.043306
ART4	4.09722	1.15877	0.23108	5.01457	5.31521e-07	9.67211e-06
ATP1A2	161.857	1.7282	0.22356	7.73039	1.07218e-14	3.10774e-12
DPT	1266.87	1.17927	0.185947	6.34195	2.26878e-10	1.33772e-08
PNOC	10.0009	1.2983	0.217822	5.96038	2.51653e-09	9.39328e-08
CFP	31.9214	1.39278	0.16686	8.34699	7.00229e-17	6.261e-14
PM20D1	3.35659	1.23021	0.220257	5.58533	2.33255e-08	6.4899e-07
XPNPEP2	31.0649	1.62565	0.225852	7.19787	6.11589e-13	8.7178e-11
STAC2	342.822	1.91775	0.269066	7.12742	1.02271e-12	1.31488e-10
LHCGR	1.05683	1.51013	0.432452	3.49201	0.000479398	0.00301671
TRPA1	133.392	-1.08049	0.335778	-3.21787	0.00129146	0.00673853
GPR15	3.8411	1.12343	0.268484	4.18434	2.86e-05	0.000289697
ZAP70	78.3394	1.18396	0.190455	6.21645	5.08516e-10	2.55179e-08
SBK2	1.40833	-1.06807	0.415702	-2.56931	0.0101902	0.0347826
UPK1B	5.14843	-1.99888	0.759317	-2.63247	0.00847669	0.0300658
BRDT	9.0551	-1.0391	0.350473	-2.96486	0.00302817	0.0133499
DMD	348.073	1.35709	0.150087	9.04198	1.53854e-19	7.56615e-16
C2orf82	7.048	1.29241	0.280014	4.61551	3.92129e-06	5.40166e-05
C2orf85	1.02343	1.84328	0.336089	5.4845	4.14639e-08	1.0718e-06
C2orf89	27.0471	1.24373	0.167831	7.41058	1.25746e-13	2.35577e-11
HOXA6	7.29112	1.1738	0.190309	6.16789	6.9209e-10	3.24145e-08
HOXA5	38.8464	1.08475	0.154686	7.01259	2.33948e-12	2.72307e-10
TSHZ2	152.899	1.01242	0.13966	7.2492	4.19246e-13	6.34384e-11
GALNTL2	427.414	1.13183	0.183788	6.15834	7.35134e-10	3.40254e-08
LGALS2	24.4577	1.39211	0.215055	6.47326	9.59088e-11	6.39533e-09
EREG	24.2176	2.36944	0.301872	7.84914	4.18906e-15	1.42074e-12
C14orf139	159.632	1.3888	0.156521	8.87293	7.12469e-19	1.4015e-15
SRRM4	0.737808	1.29305	0.392821	3.2917	0.00099585	0.00546426
PTGS2	79.9975	1.01426	0.183496	5.52745	3.24912e-08	8.64863e-07
NTRK2	2305.19	1.08114	0.208899	5.17542	2.27395e-07	4.66919e-06
BMP2	46.0323	1.35433	0.158061	8.56842	1.04919e-17	1.36901e-14
PRKCB	197.449	1.20041	0.172759	6.94848	3.69253e-12	4.05786e-10
C3orf55	19.2879	1.11645	0.193936	5.75678	8.57345e-09	2.71139e-07
MPZ	18.9449	1.20407	0.173093	6.95624	3.49485e-12	3.90609e-10
AKR1B10	61.1631	-2.4173	0.343288	-7.04159	1.9006e-12	2.29366e-10
C10orf90	6.44794	1.51542	0.218152	6.9466	3.74201e-12	4.0894e-10
ADH4	1.86159	1.74918	0.351537	4.97581	6.49756e-07	1.13916e-05
C4orf7	83.1216	2.22346	0.318027	6.9914	2.7215e-12	3.07671e-10
TDGF3	0.607403	1.11261	0.29041	3.83115	0.000127543	0.00100719
KLK5	113.739	1.12761	0.240628	4.68612	2.78435e-06	4.03915e-05
DAZL	1.08151	1.50555	0.345803	4.35377	1.33817e-05	0.000154117
NEUROG2	2.24203	1.21742	0.350703	3.47138	0.000517791	0.00320644
CCL21	258.136	1.33044	0.229886	5.7874	7.14837e-09	2.32807e-07
CCL23	3.49189	1.43626	0.233183	6.15938	7.303e-10	3.38815e-08
CCL24	0.520857	1.8956	0.662672	2.86055	0.00422911	0.017317
C8orf47	3.42063	1.06102	0.234512	4.52437	6.05744e-06	7.83405e-05
ZNF831	47.3607	1.34653	0.201135	6.69467	2.16157e-11	1.78657e-09
ATOH8	72.685	1.48204	0.18056	8.208	2.24904e-16	1.52555e-13
LOC643719	11.6887	1.00284	0.207807	4.82584	1.39417e-06	2.2351e-05
SLC17A7	20.858	1.03574	0.172099	6.01828	1.7628e-09	7.13499e-08
C16orf54	79.428	1.14108	0.159918	7.13545	9.64733e-13	1.25677e-10
BHMT2	95.7948	1.09691	0.166487	6.58852	4.44221e-11	3.28506e-09
TP53TG5	0.681869	-1.10598	0.361471	-3.05966	0.0022159	0.0103956
MMP27	3.40201	1.36546	0.249947	5.46301	4.68124e-08	1.19435e-06
SYT1	1049.52	-1.20009	0.260147	-4.61313	3.96643e-06	5.44478e-05
PALMD	761.231	1.04317	0.146244	7.13309	9.81397e-13	1.27007e-10
ANGPT4	2.80073	1.16099	0.224196	5.17844	2.23744e-07	4.62318e-06
KRT77	1.25882	1.20086	0.453745	2.64655	0.0081317	0.0290479
TTC24	1.40121	1.22779	0.301347	4.07435	4.61435e-05	0.00043597
SLC22A12	1.06637	2.59369	0.663489	3.90916	9.26167e-05	0.000771976
IL18RAP	9.23259	1.03078	0.167655	6.14819	7.83722e-10	3.58526e-08
MATN4	1.65438	1.09358	0.279335	3.91496	9.04208e-05	0.000754952
EBF3	123.859	1.01695	0.152777	6.65645	2.80523e-11	2.18664e-09
EBF1	363.37	1.0705	0.145374	7.36377	1.78782e-13	3.05811e-11
DDX25	3.17936	1.22804	0.342867	3.58167	0.000341403	0.00229676
OTC	0.474541	1.20122	0.461359	2.60365	0.00922372	0.0321873
TBX21	19.586	1.02019	0.179738	5.676	1.37878e-08	4.12816e-07
PCK1	87.8174	1.44978	0.303851	4.77135	1.82995e-06	2.81886e-05
WNT16	2.35711	1.11323	0.243231	4.57686	4.72013e-06	6.29917e-05
KRT4	19.6789	-2.30625	0.455766	-5.06016	4.18897e-07	7.86883e-06
NMNAT2	119.035	1.7188	0.216894	7.92462	2.28849e-15	8.82686e-13
CNTNAP3	40.3091	1.30174	0.170637	7.6287	2.37141e-14	5.62023e-12
CNTNAP4	1.11705	1.43544	0.365449	3.92788	8.56994e-05	0.000721967
KLF14	2.05266	1.16941	0.217072	5.38722	7.15578e-08	1.73351e-06
KRTDAP	2.82934	-2.17746	0.896735	-2.42821	0.0151735	0.0474303
KLK6	47.1443	1.17617	0.237349	4.95543	7.2169e-07	1.25398e-05
HBD	0.844453	1.1738	0.425976	2.75556	0.00585917	0.0223841
FAM132A	4.3802	1.0729	0.220304	4.8701	1.11539e-06	1.83914e-05
SLC22A3	61.5848	1.7861	0.202809	8.80684	1.28719e-18	2.30184e-15
PRF1	90.8279	1.03939	0.151913	6.84199	7.81008e-12	7.45786e-10
LOC400804	0.76354	1.01885	0.264512	3.8518	0.000117254	0.000937985
EOMES	40.8746	1.13417	0.201009	5.64238	1.67717e-08	4.85885e-07
TUSC5	341.965	1.54854	0.316212	4.89715	9.72343e-07	1.63199e-05
PDE3B	212.342	1.55388	0.197411	7.87127	3.5106e-15	1.23316e-12
CNR2	4.5891	1.13387	0.274474	4.13108	3.61062e-05	0.0003553
GP1BA	15.5012	1.0166	0.164284	6.18807	6.09071e-10	2.90802e-08
ACTN2	25.0395	1.67095	0.327004	5.10989	3.22338e-07	6.26553e-06
SAA2	251.703	1.54492	0.24979	6.1849	6.21421e-10	2.95779e-08
SAA1	888.744	1.55717	0.238712	6.52324	6.88043e-11	4.83375e-09
GLYAT	14.8062	1.19083	0.33464	3.55854	0.000372929	0.00246916
PCSK2	6.52435	-1.3418	0.463566	-2.89451	0.00379754	0.0158804
PCSK1	259.305	1.31966	0.355492	3.71221	0.000205456	0.00150411
SCRG1	6.21454	1.29875	0.218037	5.95654	2.5763e-09	9.58005e-08
ODAM	1.58299	1.31321	0.404598	3.2457	0.00117162	0.00622215
APOB	10.4606	1.24344	0.275081	4.52026	6.17643e-06	7.95655e-05
SDPR	416.396	1.232	0.185792	6.63105	3.33303e-11	2.54124e-09
ALAS2	1.06763	1.18745	0.453503	2.6184	0.00883441	0.0311047
C1orf110	2.25568	-1.62646	0.640769	-2.53829	0.0111396	0.0374499
TIGIT	85.6683	1.05614	0.197463	5.34853	8.86735e-08	2.06727e-06
TMC2	2.47789	1.02361	0.23581	4.34084	1.41942e-05	0.000161176
GNG13	18.5574	-1.47224	0.306128	-4.80924	1.51507e-06	2.40929e-05
LIPE	637.433	1.23806	0.197695	6.26247	3.78937e-10	2.01461e-08
HPCAL4	4.9069	1.12387	0.185143	6.07026	1.27703e-09	5.36762e-08
CSMD3	5.73826	-2.66359	0.578879	-4.60129	4.19877e-06	5.71585e-05
PI16	297.447	1.66975	0.282721	5.906	3.50504e-09	1.24679e-07
POU2AF1	136.154	1.18435	0.21211	5.58367	2.35497e-08	6.54302e-07
BMX	32.7076	1.02489	0.181461	5.64798	1.62341e-08	4.73799e-07
G0S2	391.835	1.48422	0.238647	6.21929	4.99396e-10	2.51888e-08
ASTN1	26.013	1.08591	0.20048	5.41653	6.0766e-08	1.49416e-06
WNT1	1.56538	1.08383	0.210678	5.14447	2.6828e-07	5.32527e-06
PRSS12	30.5661	1.16363	0.19378	6.00489	1.91465e-09	7.6087e-08
CFHR1	1.27077	2.19967	0.444177	4.95223	7.33673e-07	1.27267e-05
SOST	1.34508	-1.24052	0.452637	-2.74066	0.00613163	0.0232086
TMPRSS11A	1.48734	-1.73993	0.56593	-3.07445	0.00210888	0.00997121
NCRNA00162	1.14581	1.02688	0.248788	4.12754	3.66672e-05	0.000359562
MUC7	16.5259	1.93421	0.473379	4.08596	4.38952e-05	0.000417939
LOC284578	3.99126	1.3024	0.215385	6.04683	1.47722e-09	6.11754e-08
NTF3	19.4863	1.44933	0.225136	6.43756	1.21411e-10	7.77939e-09
CAV2	832.793	1.00887	0.135065	7.46948	8.05102e-14	1.59971e-11
CAV1	2914.47	1.22569	0.151764	8.07626	6.67859e-16	3.36858e-13
CYP24A1	18.4045	1.91619	0.323407	5.925	3.12305e-09	1.12722e-07
KIF25	3.70756	1.00635	0.253825	3.96472	7.34828e-05	0.000636325
PROL1	56.8793	3.08262	0.395536	7.79352	6.517e-15	2.03485e-12
ESPNP	2.64466	-1.03195	0.272689	-3.78433	0.00015412	0.00118057
KIR3DL2	2.09886	1.20011	0.27603	4.34775	1.3754e-05	0.000157299
KCNA4	1.14051	2.72428	0.506582	5.37776	7.54162e-08	1.81345e-06
KCNA2	2.33798	2.31689	0.283166	8.1821	2.78933e-16	1.71465e-13
KCNA1	16.8931	1.19064	0.214527	5.55005	2.85587e-08	7.74867e-07
PLA2G2A	189.716	1.29477	0.286517	4.51898	6.21374e-06	7.99241e-05
PLA2G2D	64.1695	1.44229	0.241545	5.97112	2.35625e-09	8.93061e-08
UNC80	3.71369	1.62114	0.302547	5.35833	8.3996e-08	1.98353e-06
HS3ST5	6.5966	-1.12015	0.432647	-2.58905	0.00962399	0.0332888
HS3ST4	6.04869	1.66416	0.323582	5.14294	2.70471e-07	5.36334e-06
PARP15	21.3739	1.02545	0.177578	5.7746	7.71344e-09	2.49558e-07
KRT14	1690.6	1.24088	0.234367	5.29457	1.19295e-07	2.67883e-06
TSLP	12.612	1.45263	0.180819	8.03364	9.4626e-16	4.23043e-13
SERPINB3	2.9789	-2.02514	0.815486	-2.48335	0.0130153	0.042269
DTHD1	6.93635	1.35079	0.240372	5.61959	1.91409e-08	5.45682e-07
DES	71.726	2.16245	0.262689	8.23195	1.84186e-16	1.29397e-13
DPPA4	1.04952	1.35493	0.303032	4.47125	7.77637e-06	9.68158e-05
TLR10	51.0773	1.24096	0.179593	6.90984	4.85206e-12	5.04999e-10
HTR2A	5.77524	1.25552	0.191631	6.55175	5.68673e-11	4.09757e-09
KLHL33	1.38026	1.05819	0.240362	4.40251	1.07004e-05	0.000127491
SCN3A	24.8331	1.17243	0.169813	6.90427	5.04619e-12	5.16998e-10
SCN3B	41.9476	1.06541	0.179433	5.93763	2.89171e-09	1.05338e-07
GPR144	1.99677	2.29654	0.512624	4.47997	7.46523e-06	9.37132e-05
MAGEA11	0.938188	-1.22016	0.491713	-2.48144	0.0130853	0.0424333
ODZ1	20.3133	1.28934	0.189174	6.81562	9.38595e-12	8.70901e-10
SPRR1A	8.66264	-1.94007	0.622937	-3.11439	0.00184324	0.00894188
TCN1	324.236	1.20391	0.30883	3.89831	9.68659e-05	0.000801282
BANK1	58.3828	1.4158	0.202684	6.98527	2.84306e-12	3.19576e-10
SIRPG	39.3116	1.06609	0.2046	5.21063	1.88204e-07	3.99371e-06
UCP1	6.82574	1.77916	0.491793	3.61769	0.000297242	0.00205665
CHL1	237.495	1.20892	0.168115	7.19106	6.42909e-13	8.89044e-11
MAP1LC3C	15.1266	1.80294	0.223674	8.0606	7.59208e-16	3.7336e-13
SLCO1A2	3.61528	1.15115	0.322829	3.56583	0.000362712	0.00241943
GABRQ	1.20695	1.17444	0.478222	2.45585	0.014055	0.0446867
GABRP	595.359	1.18628	0.235464	5.03804	4.70311e-07	8.7032e-06
KRT13	118.582	-3.19355	0.489156	-6.52869	6.63487e-11	4.67794e-09
MIA2	1.83733	1.22827	0.505654	2.42907	0.0151376	0.0473482
PLP1	48.1488	1.06451	0.204042	5.21709	1.81754e-07	3.88196e-06
SMOC1	73.0876	1.03915	0.221739	4.68635	2.78114e-06	4.03748e-05
CMTM5	1.55746	1.5195	0.290365	5.23307	1.66717e-07	3.61178e-06
SFTPA2	32.2312	-1.21479	0.277567	-4.37659	1.20552e-05	0.000141154
ALDH1L1	59.2494	1.6374	0.251202	6.51826	7.11276e-11	4.96153e-09
VIT	63.1487	1.69169	0.222867	7.59056	3.18524e-14	7.20193e-12
FIGF	51.7105	1.98688	0.280854	7.07442	1.50075e-12	1.84508e-10
LGALS7B	3.62372	1.07721	0.289655	3.71892	0.000200077	0.00147129
IRF4	106.352	1.22047	0.182794	6.67677	2.44264e-11	1.95581e-09
ITK	122.855	1.27628	0.190477	6.70044	2.07796e-11	1.73939e-09
CIDEC	294.717	1.47175	0.307667	4.78357	1.72207e-06	2.69046e-05
KY	13.3093	1.29251	0.219726	5.88234	4.04494e-09	1.4158e-07
NAALAD2	21.4507	1.1759	0.153487	7.66127	1.84109e-14	4.52702e-12
CPB2	1.08099	-1.76068	0.471748	-3.73225	0.000189777	0.00140872
EDAR	4.51017	1.29415	0.239015	5.41451	6.14555e-08	1.50923e-06
CR2	44.6909	2.20479	0.352142	6.26109	3.82298e-10	2.027e-08
CR1	49.038	1.70669	0.218834	7.79902	6.23891e-15	1.99562e-12
PSCA	96.846	-1.02733	0.279415	-3.67673	0.000236239	0.00169973
AOX1	272.701	1.0953	0.17056	6.42179	1.34678e-10	8.54599e-09
GPR55	11.9413	1.10556	0.163226	6.77316	1.25996e-11	1.12658e-09
VSX2	0.772936	1.47541	0.374006	3.94489	7.98378e-05	0.000681636
HSPB6	505.113	1.06955	0.1828	5.85093	4.88819e-09	1.67811e-07
TPH1	15.6429	1.10871	0.295329	3.75416	0.000173924	0.00130782
FOXE1	3.18676	-1.15562	0.390027	-2.96292	0.00304733	0.0134073
DCD	105.58	3.12447	0.74931	4.16979	3.04877e-05	0.000306607
DPY19L2P1	12.9543	-1.07702	0.248258	-4.33832	1.43575e-05	0.000162408
GPBAR1	14.0891	1.01132	0.165368	6.11558	9.62037e-10	4.27184e-08
PDCD1	28.07	1.00022	0.192652	5.19186	2.082e-07	4.35229e-06
PROK2	0.607373	1.23086	0.348674	3.53011	0.00041538	0.00269401
SLC29A4	129.709	1.05823	0.173621	6.09507	1.0939e-09	4.74213e-08
STAC	26.9392	1.10165	0.14668	7.51055	5.88782e-14	1.23212e-11
IL12B	5.43519	1.20767	0.245443	4.92036	8.63852e-07	1.4649e-05
LOC283392	11.6121	1.45167	0.30348	4.78342	1.72334e-06	2.69046e-05
ST8SIA2	36.1737	1.13934	0.203876	5.58841	2.29162e-08	6.3941e-07
GPC3	432.307	1.14015	0.190672	5.97967	2.23592e-09	8.57365e-08
C2orf40	77.7793	1.63444	0.209918	7.78609	6.91133e-15	2.09158e-12
FLJ12825	30.8887	-1.05017	0.19472	-5.39326	6.919e-08	1.67822e-06
PRRG3	2.29232	1.37527	0.237845	5.78222	7.37229e-09	2.39703e-07
ALDH3A1	22.6083	-1.90473	0.313875	-6.06842	1.29173e-09	5.41785e-08
KCNIP2	134.12	1.65178	0.227376	7.26455	3.74276e-13	5.77625e-11
WFDC5	0.768099	-1.39242	0.510409	-2.72805	0.00637091	0.0239459
PATL2	9.33801	1.00696	0.192258	5.23757	1.62707e-07	3.53658e-06
GLRA3	107.441	1.04696	0.423636	2.47136	0.01346	0.0433063
TRHDE	10.8353	1.29849	0.256481	5.06271	4.13332e-07	7.78053e-06
CDO1	160.927	1.58279	0.190027	8.32928	8.13363e-17	6.95637e-14
PAK7	11.6	1.19577	0.233808	5.11432	3.14869e-07	6.13853e-06
PAK3	8.53552	1.10225	0.184706	5.96761	2.40756e-09	9.06225e-08
ZBTB16	92.2981	1.34854	0.221981	6.07504	1.23958e-09	5.26648e-08
SHISA3	6.38891	1.34743	0.225025	5.98792	2.12538e-09	8.21381e-08
KRT79	2.8219	1.13123	0.284775	3.97236	7.11629e-05	0.000620774
TRIM29	648.82	1.01717	0.18704	5.43826	5.3802e-08	1.35338e-06
CDH20	3.24226	1.18926	0.251044	4.73727	2.16616e-06	3.27521e-05
FCER2	12.4292	2.10422	0.32539	6.46677	1.00118e-10	6.65342e-09
FAM196B	21.0949	1.23476	0.227636	5.42425	5.81991e-08	1.44734e-06
HEMGN	0.742628	1.27339	0.331409	3.84234	0.000121867	0.00097015
MEOX1	152.025	1.25747	0.200185	6.28152	3.35282e-10	1.83034e-08
MEOX2	140.716	1.09654	0.171768	6.38383	1.72718e-10	1.07178e-08
XIRP2	1.21417	1.66223	0.563584	2.9494	0.00318394	0.0138595
CKMT2	22.7099	1.06849	0.178376	5.99012	2.09692e-09	8.15188e-08
IDO2	1.72458	1.33171	0.258397	5.15374	2.55341e-07	5.13581e-06
TRDN	4.58814	1.89204	0.295394	6.40514	1.50233e-10	9.41159e-09
REC8	69.8141	1.05671	0.189273	5.58301	2.36385e-08	6.55844e-07
BMP6	89.9898	1.00996	0.138053	7.31575	2.55943e-13	4.12677e-11
CD27	141.701	1.01208	0.183237	5.52335	3.32597e-08	8.84124e-07
RPL3L	1.47846	2.84394	1.04352	2.72532	0.00642384	0.0240875
HSD11B1	74.1712	1.37322	0.191326	7.17741	7.10448e-13	9.70501e-11
PCDH9	51.9727	2.0712	0.231964	8.92895	4.30085e-19	1.05752e-15
HSF5	2.38664	1.07806	0.208874	5.16131	2.45227e-07	4.95773e-06
LHX1	1.74489	-1.93114	0.694754	-2.7796	0.00544252	0.0211039
LHX9	0.946487	-1.56996	0.471436	-3.33016	0.000867968	0.0048922
B3GALT1	2.49099	1.39352	0.235894	5.90742	3.47514e-09	1.24064e-07
OCA2	1.30926	1.11708	0.305952	3.65114	0.000261077	0.00184271
ANKRD35	56.6667	1.00628	0.134339	7.49062	6.85491e-14	1.4194e-11
TMEM71	40.2369	1.0734	0.146334	7.33524	2.2133e-13	3.62815e-11
NELL1	19.9262	-2.19709	0.543121	-4.04531	5.22535e-05	0.000482273
AK5	351.077	1.08713	0.201053	5.40716	6.40305e-08	1.5666e-06
OXTR	328.54	1.05175	0.204839	5.1345	2.8289e-07	5.5927e-06
MME	733.581	1.19303	0.16424	7.26398	3.75863e-13	5.77625e-11
NCR1	0.804993	1.51922	0.320781	4.73601	2.17963e-06	3.29053e-05
PDE1C	23.4877	1.27415	0.167962	7.58595	3.30048e-14	7.30744e-12
SFTPB	10.6783	-2.36725	0.419853	-5.63829	1.71746e-08	4.96096e-07
UGT2B28	18.0486	2.15697	0.421105	5.12216	3.02052e-07	5.91798e-06
MIA	52.5707	1.30077	0.220859	5.88962	3.87078e-09	1.35968e-07
S1PR4	36.1377	1.09103	0.166725	6.54392	5.99275e-11	4.28667e-09
HIST1H3J	1.40116	-1.04388	0.221889	-4.70454	2.54437e-06	3.73789e-05
LOC339524	130.107	1.06677	0.169383	6.29799	3.01535e-10	1.68698e-08
FGFR4	246.22	-1.03325	0.234425	-4.4076	1.04521e-05	0.000124835
FGFR3	620.267	-1.1339	0.18931	-5.98963	2.10315e-09	8.15996e-08
CTSW	81.5215	1.05529	0.176791	5.96914	2.385e-09	9.02219e-08
CXCL3	3.69959	1.30062	0.228975	5.6802	1.34538e-08	4.03429e-07
CXCL2	42.9972	1.37507	0.2162	6.36016	2.01545e-10	1.21988e-08
CXCL5	4.70852	1.11016	0.239273	4.63973	3.48863e-06	4.88433e-05
CXCL6	3.5401	1.0269	0.273656	3.75251	0.000175071	0.00131544
CXCL9	1734.51	1.25054	0.217179	5.7581	8.50658e-09	2.69892e-07
THRSP	382.193	1.31287	0.247956	5.29478	1.19159e-07	2.67882e-06
ABCA10	45.0753	1.47509	0.197646	7.46331	8.43765e-14	1.65977e-11
PTGFR	62.9308	1.21835	0.177487	6.86441	6.67656e-12	6.56673e-10
PROKR1	1.03797	1.60745	0.408919	3.93097	8.46026e-05	0.000714256
PENK	16.2203	1.21689	0.267785	4.54429	5.51202e-06	7.22846e-05
LOC728264	228.295	1.05572	0.14755	7.15499	8.36816e-13	1.1198e-10
TMEM37	269.918	1.10802	0.167946	6.59747	4.18222e-11	3.11623e-09
SPHKAP	4.82629	1.75095	0.320386	5.46511	4.62626e-08	1.1834e-06
MYH1	6.61406	2.98991	0.359745	8.31119	9.4744e-17	7.45484e-14
AOC3	1520.74	1.16694	0.168241	6.93612	4.03002e-12	4.35574e-10
EPO	5.2698	-1.63282	0.301069	-5.4234	5.84749e-08	1.4489e-06
LY9	55.9159	1.19854	0.196147	6.11042	9.93666e-10	4.39245e-08
PTX3	38.0093	1.37224	0.181185	7.57367	3.62829e-14	7.93023e-12
DLX1	27.317	-1.12214	0.298329	-3.76141	0.00016896	0.00127733
USP44	6.36413	1.03765	0.150281	6.9047	5.03085e-12	5.16998e-10
PYHIN1	39.4793	1.21216	0.194508	6.23192	4.60761e-10	2.35419e-08
FADS6	1.09715	-1.02853	0.414649	-2.48047	0.0131208	0.0424918
C5orf20	18.6844	1.41323	0.20017	7.06013	1.66347e-12	2.03243e-10
PIGR	764.022	1.49229	0.281698	5.29749	1.17407e-07	2.64852e-06
NCAM1	97.4825	1.22677	0.193158	6.35111	2.13769e-10	1.27426e-08
SLITRK2	4.449	1.08105	0.199138	5.42867	5.67757e-08	1.4173e-06
PIK3C2G	63.0031	1.16472	0.231062	5.04074	4.63742e-07	8.5978e-06
C14orf49	63.7763	1.28348	0.159756	8.03406	9.4302e-16	4.23043e-13
GDF10	40.8961	1.33295	0.221875	6.00764	1.88244e-09	7.50763e-08
GZMB	42.5099	1.6928	0.203993	8.29834	1.05576e-16	7.98762e-14
GZMM	23.782	1.1763	0.19675	5.97863	2.25016e-09	8.61145e-08
GZMK	175.204	1.06244	0.20245	5.24791	1.53831e-07	3.37586e-06
TKTL1	0.849242	1.38698	0.267811	5.17893	2.23163e-07	4.62087e-06
CA9	19.294	-1.07878	0.377754	-2.85578	0.00429308	0.0175279
CA3	42.7139	1.0658	0.214819	4.96138	6.99941e-07	1.22061e-05
CA6	0.814514	2.08166	0.468587	4.44243	8.89497e-06	0.000109206
CA4	16.1051	2.59254	0.374607	6.9207	4.49417e-12	4.80461e-10
FUT7	11.8787	1.01755	0.162745	6.25245	4.04059e-10	2.10829e-08
GSTA1	22.7477	-1.26992	0.375617	-3.38089	0.000722522	0.00421243
GSTA3	2.70119	-1.81599	0.457179	-3.97216	7.12249e-05	0.000620991
MKX	182.28	-1.40458	0.281424	-4.99097	6.00771e-07	1.06591e-05
NCRNA00092	2.32694	1.38011	0.222552	6.20127	5.60098e-10	2.72042e-08
C10orf128	21.5254	1.0554	0.147401	7.16011	8.06121e-13	1.08611e-10
DMRT2	21.5865	1.02359	0.186926	5.47593	4.35218e-08	1.11911e-06
HSPB7	113.503	1.21429	0.193556	6.27358	3.52843e-10	1.9068e-08
CADM3	100.261	1.53381	0.194373	7.89105	2.99646e-15	1.09856e-12
SLAMF6	119.714	1.21732	0.188889	6.44464	1.15875e-10	7.50433e-09
SLAMF1	39.8269	1.23617	0.188184	6.56896	5.06679e-11	3.67781e-09
FCRL1	8.14246	1.26617	0.296281	4.27354	1.92396e-05	0.00020806
FCRL3	27.2365	1.51767	0.247818	6.12414	9.11749e-10	4.08542e-08
SLC28A3	92.6226	1.39291	0.289261	4.8154	1.46905e-06	2.34179e-05
LRRC7	0.703221	1.46469	0.405248	3.6143	0.000301166	0.00208014
LRRC2	19.4387	1.34538	0.185031	7.27108	3.56632e-13	5.5677e-11
ESR2	10.2551	1.0994	0.160177	6.86368	6.71088e-12	6.56765e-10
PRRT4	16.2261	1.01397	0.226167	4.48326	7.35128e-06	9.23416e-05
KIAA0408	31.2164	1.93191	0.402675	4.79769	1.60507e-06	2.53398e-05
TSPAN7	390.526	1.00595	0.136569	7.36589	1.75963e-13	3.03629e-11
C12orf42	1.3509	1.22513	0.311186	3.93697	8.25174e-05	0.000700561
PNCK	37.1673	-1.03781	0.254249	-4.08186	4.46767e-05	0.000424353
FCRL5	56.7354	1.2279	0.238355	5.15156	2.58335e-07	5.16958e-06
UBD	635.641	1.28917	0.205139	6.28437	3.29182e-10	1.80372e-08
CFTR	5.26718	1.43515	0.251938	5.69647	1.22315e-08	3.72453e-07
ANKRD53	12.1913	1.01519	0.164147	6.18462	6.22504e-10	2.95779e-08
C1QL2	1.50904	1.04557	0.317828	3.28974	0.0010028	0.00549625
HRCT1	25.8579	1.02125	0.190456	5.36215	8.2239e-08	1.95377e-06
EPHA6	6.9473	-1.15285	0.279615	-4.12299	3.73989e-05	0.00036528
RNF150	83.1457	1.22475	0.16984	7.21119	5.54636e-13	8.02223e-11
PAPPA2	5.02112	1.20649	0.211625	5.70107	1.1906e-08	3.63105e-07
MESTIT1	3.35269	1.10678	0.210129	5.26713	1.38572e-07	3.05931e-06
GLP2R	0.839471	2.01975	0.418632	4.82465	1.40246e-06	2.24474e-05
TF	263.467	1.52105	0.242875	6.2627	3.78375e-10	2.01461e-08
KCNJ16	11.4632	1.99832	0.256261	7.79799	6.2899e-15	1.99562e-12
CARTPT	1000.19	3.64732	0.956544	3.81302	0.000137277	0.00106858
IGSF10	174.837	1.11438	0.180272	6.18165	6.34364e-10	3.00689e-08
LECT1	0.629173	1.48167	0.449467	3.29651	0.000978933	0.00539551
CIDEA	129.101	2.43043	0.337589	7.19938	6.04881e-13	8.68512e-11
SLC4A4	96.4701	1.13952	0.2583	4.41162	1.026e-05	0.000122865
SLC4A1	0.722855	1.28326	0.406273	3.15861	0.00158524	0.00793465
CLCA4	5.68936	1.70149	0.286376	5.94147	2.82483e-09	1.03477e-07
ASPA	20.2809	1.21331	0.194107	6.25075	4.08478e-10	2.12571e-08
AQP5	49.4655	1.00536	0.285226	3.52478	0.000423837	0.00273713
MYOC	9.41115	2.47244	0.346332	7.13894	9.40502e-13	1.24165e-10
NOS1	1.2705	1.44585	0.32964	4.38615	1.15372e-05	0.000135735
AICDA	0.921189	1.4695	0.302476	4.85824	1.18436e-06	1.93984e-05
SEC14L4	0.989344	1.31337	0.383838	3.42168	0.000622366	0.00372568
SLC12A1	10.0468	1.27746	0.282227	4.52637	6.00065e-06	7.76571e-05
SLC12A3	4.95113	1.27612	0.221189	5.76937	7.95682e-09	2.56037e-07
FGG	8.89504	2.22402	0.501299	4.43652	9.14232e-06	0.000111562
CCDC129	5.71704	1.68545	0.2742	6.14677	7.90774e-10	3.60077e-08
LGALS12	88.1084	1.78366	0.265296	6.72326	1.77702e-11	1.50025e-09
PIWIL2	10.9527	1.08433	0.190705	5.6859	1.30125e-08	3.92589e-07
FABP6	7.17134	-1.10306	0.441838	-2.49653	0.0125416	0.0410902
FABP7	19.5333	1.05075	0.327588	3.20754	0.00133876	0.00692474
GABRA4	0.713894	1.5733	0.440412	3.57233	0.000353822	0.00236777
GRIA1	40.4234	1.05715	0.323751	3.26533	0.00109337	0.00588608
GRIA4	27.8507	1.49053	0.26816	5.55835	2.72344e-08	7.42005e-07
SCN9A	27.3626	1.14802	0.168315	6.82068	9.06105e-12	8.48761e-10
ABCB5	12.7213	1.61307	0.236271	6.8272	8.65857e-12	8.14941e-10
ADH1C	46.1415	1.11543	0.254609	4.38097	1.18151e-05	0.00013859
ADH1B	2474.17	1.87302	0.299385	6.25623	3.94388e-10	2.07931e-08
ADH1A	20.1807	1.76888	0.297147	5.95287	2.63483e-09	9.72416e-08
CLEC4GP1	1.35495	2.47289	0.388305	6.36844	1.90966e-10	1.17025e-08
BTN1A1	1.37242	1.30611	0.253806	5.1461	2.65955e-07	5.29555e-06
CETP	24.4787	1.00317	0.165441	6.06361	1.33097e-09	5.55869e-08
RSPO3	86.7577	1.34735	0.150718	8.93956	3.9073e-19	1.05752e-15
TRPM6	11.5627	1.34216	0.179407	7.48108	7.37121e-14	1.51041e-11
TRPM3	1.29117	1.8832	0.321151	5.8639	4.52111e-09	1.563e-07
CCR7	148.263	1.4968	0.194293	7.70381	1.3207e-14	3.46393e-12
ZBED2	15.1372	1.09205	0.208175	5.24582	1.55589e-07	3.40823e-06
C8B	0.850186	2.24032	0.561763	3.98802	6.66262e-05	0.000588507
CXorf49B	0.358958	1.31488	0.518411	2.53637	0.0112009	0.0375929
CHIT1	225.445	1.36286	0.261307	5.21556	1.83267e-07	3.90578e-06
DMRTA1	10.2986	1.04821	0.208338	5.0313	4.87158e-07	8.97273e-06
FAM19A4	0.706544	1.27746	0.356427	3.58406	0.000338296	0.00227742
AQP7P3	1.60204	1.43016	0.405441	3.52741	0.000419649	0.00271921
AQP7P1	13.683	1.45594	0.280419	5.19201	2.0803e-07	4.35229e-06
RAB3C	6.4663	1.05931	0.229036	4.6251	3.7441e-06	5.20129e-05
CHRNA4	1.47077	2.00219	0.594476	3.368	0.000757155	0.0043793
CHGB	732.684	4.4352	0.460743	9.62618	6.19891e-22	6.09694e-18
FOLR2	238.517	1.02228	0.164723	6.20608	5.43242e-10	2.66487e-08
ABCD2	40.238	1.76321	0.205006	8.60079	7.9171e-18	1.11241e-14
SBSN	4.52667	-1.40642	0.390267	-3.60375	0.000313653	0.00214357
CSN3	0.535804	1.45317	0.499451	2.90953	0.00361972	0.0152994
LILRB5	58.8831	1.24675	0.199293	6.25586	3.95333e-10	2.07931e-08
KIR2DS4	1.38949	1.13993	0.32839	3.47125	0.000518033	0.00320644
TACR1	72.7129	1.4237	0.184907	7.69954	1.3656e-14	3.53458e-12
KCNH8	10.6582	1.37407	0.218231	6.29641	3.0462e-10	1.68807e-08
PGLYRP2	199.747	-1.00586	0.262527	-3.83146	0.000127385	0.00100634
GFAP	16.4032	1.66139	0.215643	7.70437	1.31495e-14	3.46393e-12
TCL1A	16.5423	1.73403	0.306208	5.6629	1.48835e-08	4.39601e-07
POU3F3	0.871782	1.47488	0.433792	3.39996	0.000673965	0.00398403
RELN	70.8993	1.57519	0.246495	6.39037	1.65489e-10	1.03017e-08
KLK7	72.1692	1.14783	0.259803	4.41807	9.9586e-06	0.000119961
KLK8	13.7691	1.07373	0.253538	4.23496	2.2859e-05	0.000239819
HSD3B2	2.14699	1.03128	0.312395	3.30122	0.000962669	0.00532228
SAA4	7.74231	1.15574	0.238891	4.83793	1.31196e-06	2.11711e-05
MAL	18.205	1.36493	0.207464	6.57913	4.73196e-11	3.47322e-09
EPHX4	69.3202	-1.27882	0.222258	-5.75376	8.72808e-09	2.75586e-07
CD300LG	143.991	2.20277	0.27216	8.09363	5.79114e-16	2.99783e-13
LRRC3B	2.46735	1.03943	0.242382	4.28838	1.79983e-05	0.000196776
NPY2R	18.2127	2.47996	0.427424	5.80212	6.54826e-09	2.15372e-07
SLC16A7	47.8344	1.42835	0.178391	8.00683	1.17702e-15	5.05253e-13
FLJ43390	0.592382	1.04696	0.419688	2.49462	0.0126092	0.0412703
LYVE1	101.013	1.56209	0.195474	7.99132	1.33507e-15	5.58768e-13
LMO1	1.89551	-1.02941	0.353445	-2.91249	0.00358556	0.0151909
PAX5	10.6371	1.44869	0.293443	4.93685	7.93935e-07	1.36517e-05
DDR2	385.187	1.1934	0.161744	7.37834	1.60275e-13	2.85972e-11
PSMA8	0.988516	2.38915	0.370875	6.44193	1.17963e-10	7.60801e-09
C7	703.284	1.28609	0.226316	5.68271	1.32573e-08	3.98754e-07
C6	56.5	1.0143	0.263897	3.84355	0.000121268	0.000965773
FBXO40	0.584726	1.41081	0.373503	3.77723	0.00015858	0.00121041
SFRP1	2172.54	1.67068	0.205316	8.1371	4.04864e-16	2.26558e-13
TMEM195	6.52359	1.67526	0.241325	6.94193	3.86772e-12	4.20342e-10
PGA3	1.59926	1.17143	0.343194	3.41332	0.000641771	0.00382902
C11orf21	10.0985	1.0784	0.172783	6.24133	4.33859e-10	2.23415e-08
COL6A6	66.8048	1.36279	0.199087	6.84522	7.63558e-12	7.33633e-10
KLK13	11.9483	-1.88866	0.30583	-6.17554	6.59387e-10	3.1105e-08
TRH	74.4695	-1.28421	0.331129	-3.87827	0.000105203	0.000858336
PPP1R16B	290.149	1.33092	0.148271	8.97631	2.80001e-19	1.05752e-15
PTN	530.533	1.42348	0.177093	8.03807	9.1262e-16	4.23043e-13
TMEM100	65.0986	1.55903	0.196053	7.95205	1.83444e-15	7.36433e-13
SIAH3	2.75861	1.41787	0.261301	5.42622	5.75604e-08	1.43507e-06
P2RX6	5.2062	1.0501	0.211871	4.95633	7.18355e-07	1.25141e-05
SLCO1C1	5.85262	1.09263	0.182093	6.00042	1.96808e-09	7.76328e-08
CCDC141	10.0198	1.22283	0.166785	7.33173	2.27196e-13	3.69353e-11
SLC6A2	2.20635	1.6569	0.26741	6.1961	5.788e-10	2.78376e-08
PCDH11X	6.23238	-1.13585	0.273005	-4.16054	3.17501e-05	0.000318164
ADRA1A	4.166	1.60752	0.264457	6.07856	1.21263e-09	5.18559e-08
IL7R	164.047	1.24394	0.198623	6.26283	3.78049e-10	2.01461e-08
GABRG1	1.32769	1.17301	0.297593	3.94167	8.09164e-05	0.000689947
LRMP	99.7779	1.05844	0.138341	7.65096	1.99483e-14	4.84449e-12
C10orf82	118.96	-1.03235	0.274577	-3.75978	0.000170061	0.00128407
FOXI3	1.89895	-1.6913	0.387349	-4.36635	1.26341e-05	0.000147143
FGFBP2	13.6233	1.56203	0.235817	6.62388	3.4989e-11	2.65741e-09
SLIT1	25.9292	-1.44034	0.249758	-5.76695	8.07167e-09	2.58596e-07
SAMD5	110.454	1.04254	0.154684	6.7398	1.58606e-11	1.35704e-09
PCDH10	69.1343	1.91215	0.30449	6.27984	3.38916e-10	1.84166e-08
KISS1	2.78389	-1.15573	0.265802	-4.3481	1.37319e-05	0.000157139
HMSD	0.837087	1.77791	0.331741	5.35934	8.35286e-08	1.97725e-06
COL17A1	916.668	1.05374	0.219202	4.80715	1.53096e-06	2.4326e-05
FAM65B	194.027	1.09391	0.164472	6.65103	2.91057e-11	2.23648e-09
GRIK1	13.901	2.80871	0.354311	7.92723	2.2408e-15	8.81574e-13
XCR1	3.91741	1.04895	0.221635	4.73279	2.21458e-06	3.3305e-05
SHC4	51.0756	1.17485	0.197297	5.95472	2.60517e-09	9.6509e-08
GPIHBP1	106.379	1.24871	0.181052	6.89701	5.31101e-12	5.3852e-10
LRRTM4	0.868251	1.4928	0.374542	3.98566	6.72929e-05	0.000593863
HEPN1	12.4544	1.59797	0.302276	5.28646	1.24705e-07	2.78442e-06
FREM1	110.686	1.43152	0.197635	7.24326	4.38013e-13	6.52738e-11
EPB42	2.66459	1.71033	0.386126	4.42946	9.44676e-06	0.000115058
PON1	5.79998	1.38772	0.361565	3.8381	0.000123991	0.000983873
CYP4F3	19.6475	-1.22913	0.308637	-3.98245	6.82098e-05	0.000599533
LCK	169.278	1.10261	0.178912	6.16286	7.14413e-10	3.33015e-08
LTB	111.135	1.01643	0.20155	5.04308	4.58087e-07	8.51704e-06
ZDHHC22	6.79721	-1.33865	0.407647	-3.28385	0.00102398	0.00557631
HEPACAM	12.2297	1.58848	0.291075	5.45729	4.83469e-08	1.22872e-06
ISL2	0.869689	1.10206	0.390725	2.82056	0.00479399	0.0190857
MDS2	0.694896	1.42097	0.341831	4.15693	3.22546e-05	0.000322235
MS4A1	125.079	1.28715	0.260522	4.94066	7.78574e-07	1.3411e-05
VSTM2A	370.892	-2.12915	0.489305	-4.35138	1.35282e-05	0.00015544
SLC19A3	179.852	1.5846	0.274787	5.76664	8.08652e-09	2.5865e-07
CCDC69	674.619	1.35999	0.152547	8.91525	4.86705e-19	1.06377e-15
OSR1	95.7117	1.05959	0.176598	5.99999	1.97328e-09	7.76328e-08
FAM150B	4.03526	1.46031	0.251431	5.808	6.32217e-09	2.09366e-07
CCL13	29.3108	1.95124	0.250199	7.79875	6.25235e-15	1.99562e-12
CCL14	462.633	1.22683	0.184311	6.65628	2.80841e-11	2.18664e-09
CCL18	84.6464	1.46788	0.238535	6.1537	7.56953e-10	3.48712e-08
CCL19	437.949	1.55959	0.240564	6.48307	8.98746e-11	6.01334e-09
ROPN1	7.78487	1.36056	0.26316	5.17008	2.33998e-07	4.77487e-06
PPP1R1A	278.918	1.32324	0.256211	5.16467	2.40868e-07	4.89981e-06
HPSE2	6.4139	1.45544	0.287885	5.05562	4.29001e-07	8.03702e-06
TAT	2037.7	3.78615	0.384269	9.85288	6.66069e-23	1.31022e-18
LCN10	11.0195	1.3979	0.228065	6.12938	8.82215e-10	3.97118e-08
IQCJ	1.95246	1.32255	0.419438	3.15314	0.00161522	0.00805605
PIRT	0.550802	1.27429	0.428794	2.97179	0.00296071	0.0131231
ANGPTL7	9.3932	1.28915	0.296987	4.34075	1.41994e-05	0.000161176
ANGPTL5	2.95288	1.58488	0.297328	5.33041	9.7989e-08	2.24917e-06
ANGPTL1	116.11	1.1865	0.182214	6.51159	7.43582e-11	5.10509e-09
GPR112	0.763005	1.31769	0.448418	2.93854	0.00329764	0.0142473
LRRN3	60.1218	1.18649	0.168569	7.03859	1.94189e-12	2.3292e-10
BLK	17.8254	1.23169	0.270196	4.55852	5.15148e-06	6.81929e-05
C14orf180	25.2865	1.5167	0.324235	4.67779	2.8998e-06	4.17279e-05
SHD	1.04255	1.56308	0.383152	4.07953	4.51276e-05	0.000427604
DLK1	10.6746	2.18167	0.437592	4.98563	6.17592e-07	1.09054e-05
P2RY14	53.9156	1.1293	0.138833	8.13421	4.14626e-16	2.26558e-13
PYGM	18.0606	1.102	0.174825	6.30347	2.91056e-10	1.6405e-08
IL33	374.762	1.20957	0.18174	6.6555	2.82347e-11	2.18664e-09
SULT1E1	1.24557	1.19154	0.401604	2.96695	0.00300765	0.0132754
GDF5	10.8848	1.0581	0.2007	5.27204	1.34917e-07	2.99206e-06
GTSF1L	0.641433	1.00359	0.359322	2.79301	0.00522205	0.0203937
KCNC1	25.8361	-1.09313	0.279978	-3.90433	9.44886e-05	0.00078525
CSF3	2.73462	1.66231	0.420533	3.95287	7.72183e-05	0.000662723
WNT7A	0.751373	1.25758	0.366164	3.43448	0.000593694	0.00358128
EMR3	1.47669	1.04291	0.242183	4.30627	1.6603e-05	0.000183482
HSD17B13	7.43109	1.107	0.231007	4.79207	1.65068e-06	2.59031e-05
MYBPC2	3.87092	1.57112	0.332069	4.73129	2.23094e-06	3.35254e-05
MIMT1	1.08519	-1.31632	0.29241	-4.50162	6.74387e-06	8.57522e-05
BBOX1	64.5448	1.46234	0.219776	6.65377	2.85686e-11	2.20382e-09
MRGPRX3	6.75381	1.28946	0.277492	4.64684	3.37054e-06	4.74602e-05
FCRLB	151.341	-1.50492	0.252027	-5.97127	2.35418e-09	8.93061e-08
FAM107A	181.569	1.41676	0.179566	7.88988	3.02484e-15	1.09856e-12
SVEP1	1001.21	1.09888	0.163045	6.73974	1.5867e-11	1.35704e-09
TNMD	25.2556	1.98556	0.297054	6.68416	2.32251e-11	1.88785e-09
CLNK	1.16213	1.46196	0.326351	4.47973	7.47372e-06	9.37599e-05
RNF186	3.21323	1.47905	0.265692	5.56679	2.59475e-08	7.09893e-07
SYT13	1710.11	-1.01239	0.293759	-3.44634	0.000568237	0.00345633
SYT14	2.98355	1.18754	0.258023	4.60245	4.17541e-06	5.69192e-05
SPATA22	1.88278	1.48847	0.293224	5.07621	3.85028e-07	7.35329e-06
GPR171	30.2942	1.16406	0.189371	6.14697	7.89779e-10	3.60077e-08
GPR174	16.949	1.29775	0.20904	6.20814	5.36166e-10	2.65798e-08
LOC440896	0.760234	1.02306	0.345508	2.96102	0.00306621	0.0134753
ERN2	0.861542	1.24234	0.516851	2.40367	0.0162313	0.0499889
ZIC2	32.9366	-1.3926	0.319468	-4.35913	1.30581e-05	0.000151009
DRD2	14.3852	1.23539	0.219134	5.6376	1.72441e-08	4.97374e-07
MMRN1	221.606	1.05403	0.18991	5.55013	2.85464e-08	7.74867e-07
LOC90586	2.5149	1.1277	0.216888	5.19945	1.99876e-07	4.20781e-06
MRC1	250.978	1.4368	0.186224	7.71545	1.20552e-14	3.37335e-12
KRT24	1.93269	-1.35966	0.499792	-2.72046	0.00651919	0.0243837
CLCA2	244.047	1.02789	0.288806	3.55911	0.00037211	0.0024659
S100B	117.666	1.9039	0.207149	9.19096	3.89365e-20	2.55307e-16
PNMA3	7.42223	1.01668	0.207954	4.88897	1.01365e-06	1.69064e-05
LOC93432	0.664042	1.58194	0.411059	3.84845	0.000118867	0.000948956
SCTR	0.666596	1.15675	0.354194	3.26586	0.00109132	0.00587824
KCNB1	17.0019	1.23348	0.208027	5.9294	3.04041e-09	1.10347e-07
CLEC6A	0.814127	1.09015	0.328476	3.31882	0.000903973	0.00505029
GABRA2	7.16888	1.80199	0.2956	6.09606	1.08713e-09	4.73119e-08
PCOLCE2	102.946	1.25439	0.246596	5.08684	3.64079e-07	6.99394e-06
TXK	10.7814	1.4044	0.190805	7.36038	1.83384e-13	3.10979e-11
SEZ6	13.3757	1.71762	0.498	3.44904	0.000562574	0.00343463
PPP2R2B	18.0987	1.31991	0.158742	8.31481	9.18962e-17	7.45484e-14
SMR3B	4.13021	2.13121	0.481848	4.423	9.73406e-06	0.000117833
GATA4	18.1475	-1.25825	0.502092	-2.50602	0.01221	0.040198
SH2D1A	70.2523	1.17376	0.195617	6.00029	1.96969e-09	7.76328e-08
ACVR1C	72.4447	1.19549	0.206276	5.79558	6.80851e-09	2.22107e-07
TNNT3	23.141	1.67446	0.265338	6.31067	2.77822e-10	1.58407e-08
SOX10	173.075	1.54274	0.248381	6.21119	5.25833e-10	2.63197e-08
C8orf34	14.3338	1.91574	0.233817	8.19332	2.5411e-16	1.6662e-13
CAPNS2	2.58751	-1.3943	0.39176	-3.55906	0.000372186	0.0024659
IL17B	9.17691	1.21293	0.232688	5.21271	1.86106e-07	3.95771e-06
PLAC8	40.6299	1.44022	0.195251	7.37624	1.62822e-13	2.85972e-11
CHRDL1	702.174	1.85565	0.246716	7.52143	5.4182e-14	1.14604e-11
DCT	2.05087	2.32542	0.343573	6.76834	1.3027e-11	1.15952e-09
FAM89A	122.674	1.29799	0.155408	8.35214	6.7036e-17	6.261e-14
MYOG	1.65443	-1.01385	0.394432	-2.5704	0.0101581	0.0347187
HSD17B2	22.0373	1.04609	0.277974	3.76326	0.000167709	0.00126934
SCARA5	130.986	2.32148	0.283509	8.18838	2.64774e-16	1.68012e-13
LOC100188949	8.02871	1.1578	0.176469	6.56091	5.34806e-11	3.86771e-09
TEPP	0.817624	1.13686	0.27793	4.09048	4.30484e-05	0.000411071
MRAP	17.6108	1.07528	0.360118	2.98591	0.00282739	0.0126952
PMP2	2.07547	2.03699	0.557896	3.65119	0.000261028	0.00184271
BTLA	25.6949	1.21496	0.206679	5.8785	4.14006e-09	1.44396e-07
CD244	12.7071	1.0238	0.139483	7.33997	2.13648e-13	3.53165e-11
FOXD3	7.60361	-1.00447	0.278576	-3.60572	0.000311286	0.00213418
CLEC4G	2.86732	1.98739	0.331749	5.99064	2.09011e-09	8.1415e-08
CLEC4D	1.18839	1.13633	0.264055	4.30338	1.68214e-05	0.000185479
CLEC4C	2.42244	2.38709	0.387417	6.16154	7.20411e-10	3.35017e-08
TCAM1P	2.90717	1.04459	0.263715	3.96105	7.46215e-05	0.000644938
UGT2B4	29.7639	-2.02217	0.443652	-4.55801	5.16403e-06	6.83132e-05
KLRC1	6.18451	1.252	0.195217	6.41335	1.42355e-10	8.94651e-09
ROPN1B	10.6096	1.2259	0.230082	5.32813	9.92314e-08	2.27239e-06
KLRC4	3.19534	1.07425	0.25689	4.18175	2.89275e-05	0.000292712
DOCK11	564.602	1.15232	0.149068	7.73014	1.0743e-14	3.10774e-12
SLC12A5	4.2897	-1.05688	0.204083	-5.17866	2.23488e-07	4.62274e-06
CDH10	0.797171	1.56213	0.445938	3.50302	0.000460013	0.00291995
CDH19	3.2487	1.57515	0.362895	4.3405	1.42157e-05	0.000161267
GPD1	853.007	1.79299	0.282708	6.3422	2.2651e-10	1.33772e-08
STK32A	2.35349	1.04331	0.21647	4.81962	1.43828e-06	2.29833e-05
NRG2	13.9052	1.743	0.220969	7.88796	3.07158e-15	1.09856e-12
NGFR	340.527	1.06387	0.159151	6.68465	2.31485e-11	1.88785e-09
PON3	200.782	1.03971	0.303493	3.42581	0.000612963	0.00367834
OOEP	0.510049	1.06996	0.398279	2.68646	0.00722139	0.0263918
GFRA2	20.6142	1.24486	0.181347	6.86453	6.67099e-12	6.56673e-10
C9orf4	0.700386	1.107	0.355198	3.11658	0.00182962	0.00889093
CPA2	0.715127	1.58663	0.4829	3.28562	0.00101758	0.00554944
CPA1	1.94096	1.43211	0.326156	4.39089	1.12888e-05	0.000133371
XKR4	0.894449	1.91624	0.342324	5.59773	2.17176e-08	6.11168e-07
SLC6A15	3.99352	1.043	0.224554	4.64478	3.40444e-06	4.78349e-05
CD52	382.986	1.01271	0.162668	6.22567	4.79513e-10	2.43106e-08
UGT1A6	16.3081	-2.31171	0.660713	-3.49882	0.000467325	0.00295682
ADIPOQ	1687.77	1.35981	0.303787	4.4762	7.59838e-06	9.49604e-05
HKDC1	1.87834	1.40349	0.266126	5.2738	1.33628e-07	2.97107e-06
IRX6	19.7826	1.14225	0.216296	5.28096	1.28512e-07	2.86616e-06
IQSEC3	22.9682	1.12349	0.171561	6.54862	5.80703e-11	4.16898e-09
LEMD1	1.30582	1.45534	0.284526	5.11496	3.13811e-07	6.12399e-06
DNASE1L3	33.8735	1.6227	0.216998	7.47794	7.54938e-14	1.53097e-11
CD40LG	31.86	1.16186	0.19655	5.91126	3.39495e-09	1.21865e-07
CALB2	152.906	1.08163	0.209127	5.17214	2.31424e-07	4.73285e-06
PRSSL1	0.578938	-1.53158	0.466798	-3.28103	0.0010343	0.00562039
KIAA0125	18.5576	1.11172	0.222077	5.006	5.55722e-07	9.9832e-06
RDH5	76.6011	1.24138	0.204178	6.0799	1.20254e-09	5.15364e-08
IL1F9	0.602056	-1.49849	0.543974	-2.7547	0.00587451	0.0224253
THEMIS	45.6858	1.15629	0.186244	6.20847	5.35046e-10	2.65798e-08
PLIN4	2479.35	1.72388	0.264	6.52985	6.58372e-11	4.65857e-09
SLC16A12	21.6893	1.24781	0.216724	5.75761	8.53138e-09	2.70243e-07
PLIN1	1119.85	1.38098	0.262111	5.2687	1.37391e-07	3.04349e-06
GPR114	40.6565	1.04349	0.173044	6.03017	1.63788e-09	6.69829e-08
NXPH1	110.893	-1.31641	0.442206	-2.97691	0.00291166	0.0129645
CST9	290.564	-1.24177	0.359523	-3.45393	0.000552483	0.00338564
SCGB3A2	1.72225	-1.92551	0.629942	-3.05664	0.00223833	0.0104759
CD36	3281.55	1.62855	0.234157	6.95493	3.5274e-12	3.9202e-10
LHFPL4	5.19103	2.26072	0.351321	6.43491	1.23546e-10	7.89051e-09
MASP1	20.5118	2.06446	0.239394	8.62369	6.48283e-18	9.80952e-15
CD3D	104.573	1.09121	0.182615	5.97546	2.29444e-09	8.76387e-08
CD3E	319.425	1.03635	0.183597	5.6447	1.65471e-08	4.81507e-07
CD3G	41.9594	1.09842	0.194665	5.64264	1.6746e-08	4.85885e-07
CD209	107.515	1.64514	0.192155	8.56156	1.11352e-17	1.36901e-14
ACADL	13.1576	1.08231	0.264242	4.0959	4.20529e-05	0.000402589
GVIN1	131.72	1.15267	0.163976	7.02951	2.07263e-12	2.45919e-10
OVCH2	1.76628	1.29127	0.313525	4.11856	3.81248e-05	0.000371447
WNT11	102.269	1.36688	0.204865	6.67212	2.5214e-11	1.99994e-09
ADAMTS18	65.5621	1.32008	0.221907	5.94878	2.70149e-09	9.95149e-08
RFX6	5.79948	2.17288	0.368757	5.89244	3.80539e-09	1.3391e-07
SLC6A14	52.7268	1.00847	0.252409	3.99539	6.45872e-05	0.000574885
ADRB1	28.9649	1.31634	0.263939	4.98728	6.12356e-07	1.08227e-05
FXYD1	58.0672	1.48622	0.214887	6.91629	4.63629e-12	4.88319e-10
NCRNA00110	13.0221	1.23146	0.27653	4.45325	8.45809e-06	0.000104444
CYP2A13	0.988887	2.11334	0.585892	3.60705	0.000309702	0.00212715
RBP4	263.321	1.57278	0.26686	5.89365	3.77751e-09	1.33406e-07
FAT2	239.437	1.1759	0.202501	5.80691	6.36349e-09	2.1038e-07
IL22RA2	4.07744	1.01577	0.254866	3.9855	6.7339e-05	0.000594002
INHA	19.0973	-1.46607	0.193135	-7.59091	3.17663e-14	7.20193e-12
TNFRSF9	19.1485	1.00552	0.191754	5.2438	1.57304e-07	3.43814e-06
UGT8	18.3108	1.00014	0.181874	5.4991	3.81741e-08	9.98567e-07
TRY6	2.01416	-1.43952	0.578621	-2.48784	0.0128522	0.0418429
TREML2	5.62055	1.09726	0.187413	5.85478	4.7765e-09	1.64263e-07
UGT2B11	534.364	3.43721	0.422494	8.13551	4.10195e-16	2.26558e-13
ZIC3	1.50331	-2.13442	0.56518	-3.77653	0.000159028	0.00121249
TMPRSS9	4.08901	-1.10457	0.231584	-4.76962	1.84576e-06	2.841e-05
TBC1D10C	95.6143	1.02601	0.162079	6.33031	2.44668e-10	1.42815e-08
MUSK	0.468164	1.10216	0.439832	2.50587	0.012215	0.0402079
NPR1	312.65	1.39333	0.168056	8.29083	1.1246e-16	8.19332e-14
ANO4	5.15734	1.4124	0.209272	6.74911	1.48752e-11	1.28939e-09
ANO3	35.5986	1.0218	0.327205	3.1228	0.00179137	0.00874176
CYP2C9	0.722713	1.28238	0.441736	2.90305	0.0036955	0.0155562
TPO	13.7188	1.02398	0.16918	6.05258	1.4254e-09	5.94049e-08
PVALB	335.36	-2.17795	0.377306	-5.77239	7.81564e-09	2.52035e-07
UGT2B10	5.80269	1.83079	0.504386	3.62974	0.000283704	0.00197829
COL25A1	12.3381	1.26189	0.180296	6.99902	2.57768e-12	2.93095e-10
SCML4	32.739	1.28803	0.194814	6.61159	3.80209e-11	2.86555e-09
CXorf41	0.791961	-1.07139	0.427088	-2.5086	0.012121	0.0399787
SLITRK1	6.41183	1.60373	0.482637	3.32285	0.000891017	0.00499493
FMO2	569.996	1.58709	0.195401	8.12222	4.57728e-16	2.4335e-13
DNER	7.99736	1.53094	0.272176	5.62483	1.85691e-08	5.31693e-07
ALS2CR11	7.16572	1.03679	0.186048	5.57267	2.50861e-08	6.90928e-07
HESRG	0.853172	1.55064	0.448966	3.45381	0.000552732	0.00338611
CYP1A1	3.8164	2.13115	0.358564	5.94359	2.78853e-09	1.02529e-07
DPP6	5.19983	1.83592	0.239141	7.67711	1.62714e-14	4.15682e-12
CYP2A7	73.1367	2.96374	0.443984	6.67534	2.46668e-11	1.96445e-09
CYP2A6	728.984	3.58189	0.426299	8.40229	4.37842e-17	4.68674e-14
FGF2	376.314	1.42216	0.184356	7.71419	1.21757e-14	3.37335e-12
TTYH1	30.9243	1.28486	0.19304	6.65592	2.81538e-11	2.18664e-09
DEFB1	31.5509	1.05627	0.209228	5.04844	4.4544e-07	8.30545e-06
CNKSR2	7.82536	1.19718	0.190258	6.29239	3.12622e-10	1.72741e-08
LRRN4CL	79.3516	1.16156	0.170876	6.79766	1.06332e-11	9.59475e-10
PRKCQ	38.0056	1.30091	0.174472	7.45627	8.90094e-14	1.73357e-11
LEP	169.912	2.4114	0.327758	7.35725	1.87733e-13	3.15633e-11
CSN1S1	0.994871	1.63664	0.543332	3.01222	0.00259342	0.0118502
FAM83C	1.35998	-1.17965	0.489338	-2.41071	0.0159215	0.0492052
PDE2A	274.996	1.17238	0.151229	7.75232	9.02311e-15	2.6893e-12
C1orf95	86.3691	-1.09681	0.253723	-4.32285	1.54023e-05	0.00017248
SCG3	7.42421	1.55787	0.347245	4.48637	7.24464e-06	9.11767e-05
SCN4A	68.687	1.46354	0.193924	7.54701	4.4536e-14	9.52248e-12
FAM129C	7.36771	1.08968	0.221126	4.92788	8.3126e-07	1.42065e-05
CXorf65	0.876811	1.32922	0.331628	4.00816	6.11939e-05	0.000550913
SCGN	25.4511	1.16446	0.385462	3.02095	0.00251984	0.0115651
PLXNA4	348.643	1.0703	0.185539	5.76863	7.99188e-09	2.56457e-07
PKHD1L1	9.81326	1.15706	0.245804	4.70725	2.51086e-06	3.69971e-05
KCNQ5	100.413	1.17725	0.220423	5.34085	9.25107e-08	2.14597e-06
KIR2DL4	1.86837	1.00179	0.261293	3.83398	0.000126087	0.000998091
AKAP12	1263.26	1.03488	0.140888	7.34546	2.05059e-13	3.4184e-11
NEFH	156.656	1.01278	0.173307	5.84385	5.10088e-09	1.73597e-07
SPIB	24.8182	1.36192	0.218943	6.22044	4.95764e-10	2.50699e-08
EGFR	323.194	1.22268	0.161181	7.58573	3.3062e-14	7.30744e-12
CXCR5	26.9511	1.03443	0.20393	5.07246	3.92706e-07	7.4709e-06
MYF6	0.859072	-1.81337	0.636082	-2.85084	0.0043604	0.0177475
ANK2	401.768	1.0029	0.138266	7.25345	4.06291e-13	6.19546e-11
WIF1	29.0859	2.79945	0.348388	8.03544	9.32408e-16	4.23043e-13
HHATL	0.790407	1.15675	0.407158	2.84104	0.00449662	0.0181479
C18orf34	14.4132	1.16562	0.198003	5.88688	3.93557e-09	1.37998e-07
CD1C	52.091	1.2846	0.183422	7.0035	2.49652e-12	2.87572e-10
MYH2	1.96925	2.01203	0.400392	5.02514	5.03056e-07	9.19666e-06
MYH6	0.550314	1.31109	0.493747	2.65538	0.00792191	0.0284306
MYH7	8.44575	4.09414	0.920942	4.4456	8.76469e-06	0.000107756
HHLA2	0.620364	1.04625	0.310953	3.36467	0.00076636	0.00442473
PTGDS	368.637	1.34793	0.177112	7.61059	2.72843e-14	6.3894e-12
PNLIPRP3	0.604266	1.84581	0.688191	2.68212	0.00731582	0.0266598
ALX4	6.43652	1.15373	0.22282	5.17782	2.24488e-07	4.63368e-06
NKG7	98.5492	1.02505	0.164577	6.22841	4.71202e-10	2.39509e-08
AQP7	96.8646	1.35599	0.269818	5.02557	5.01946e-07	9.19347e-06
ENAM	0.700048	1.15041	0.364856	3.15306	0.00161571	0.00805645
UGT1A7	3.574	-2.75116	0.932515	-2.95026	0.0031751	0.0138272
BTNL9	232.547	1.29563	0.190269	6.80946	9.79628e-12	8.96291e-10
TIFAB	9.46095	1.35592	0.208239	6.51134	7.44833e-11	5.10509e-09
NPY	1.38077	-2.09424	0.749468	-2.7943	0.00520129	0.0203328
LGI1	3.11289	-1.30376	0.416739	-3.12847	0.00175718	0.00862199
KCNS1	7.18632	1.06309	0.196853	5.40042	6.6484e-08	1.61857e-06
INA	3.53094	1.43268	0.290908	4.92483	8.44318e-07	1.43797e-05
DARC	637.157	1.31769	0.20212	6.51933	7.06237e-11	4.94391e-09
CAPN6	98.2453	1.45655	0.227924	6.39051	1.65329e-10	1.03017e-08
ELFN2	23.0511	-1.09888	0.240078	-4.57718	4.71281e-06	6.29366e-05
MAMDC2	193.133	1.19907	0.152413	7.86727	3.62464e-15	1.25088e-12
TNXB	1035.16	1.44528	0.182771	7.90758	2.62448e-15	9.92809e-13
SERPINB13	2.67626	-1.96876	0.814313	-2.41769	0.0156192	0.0485149
TMEM132C	102.196	2.02654	0.262646	7.71586	1.20169e-14	3.37335e-12
CMA1	14.3922	1.18968	0.258566	4.60107	4.20318e-06	5.7179e-05
PRAME	274.513	1.44329	0.428478	3.36841	0.000756029	0.00437665
SPOCK3	4.6684	1.12454	0.272282	4.13006	3.62662e-05	0.000356523
CLDN19	21.239	1.05745	0.234494	4.50949	6.4984e-06	8.28989e-05
TNFRSF13B	8.39742	1.09605	0.255066	4.29711	1.73038e-05	0.000190158
BCL11A	54.0608	1.38372	0.187791	7.3684	1.72689e-13	3.00616e-11
UBASH3A	31.2504	1.1644	0.194977	5.97198	2.34387e-09	8.93061e-08
GPR12	5.41081	1.3136	0.262377	5.00652	5.54232e-07	9.96554e-06
GPR18	20.385	1.22045	0.18226	6.69622	2.13879e-11	1.7752e-09
C12orf39	3.40215	2.02999	0.478935	4.23856	2.24962e-05	0.000237024
SLC26A7	11.1935	1.15276	0.182146	6.32875	2.47148e-10	1.43836e-08
GPX3	2304.09	1.31488	0.192093	6.84504	7.64551e-12	7.33633e-10
SIT1	47.1038	1.16591	0.188142	6.19697	5.75619e-10	2.78206e-08
BEND4	2.97018	1.05539	0.245107	4.30584	1.66357e-05	0.000183637
NTS	33.1448	-1.59824	0.437796	-3.65065	0.000261575	0.00184371
ALB	77.1522	1.19232	0.288782	4.12878	3.64693e-05	0.000357799
ABCA6	191.643	1.07401	0.164412	6.53247	6.46957e-11	4.59433e-09
CLLU1OS	0.730133	1.13077	0.388407	2.91129	0.00359938	0.0152331
ABCA8	356.839	1.76659	0.230437	7.66623	1.77124e-14	4.41038e-12
ABCA9	193.742	1.52711	0.195423	7.81438	5.52346e-15	1.84156e-12
TIMP4	172.749	1.13753	0.24311	4.6791	2.88141e-06	4.15807e-05
DKK4	1.24469	1.43742	0.422482	3.40232	0.000668163	0.00395768
KIRREL3	5.61463	2.05358	0.263626	7.78974	6.71466e-15	2.06381e-12
NCR3	8.38338	1.34809	0.2173	6.20384	5.5102e-10	2.6963e-08
CD96	154.147	1.04673	0.175415	5.96717	2.41402e-09	9.06225e-08
CLEC10A	96.6751	1.53475	0.202926	7.56309	3.93606e-14	8.50837e-12
ITIH1	0.870567	1.13989	0.287153	3.9696	7.19927e-05	0.000626069
ITIH2	12.34	2.9758	0.332584	8.94752	3.63563e-19	1.05752e-15
ITIH5	833.852	1.64587	0.190031	8.66104	4.67473e-18	7.66306e-15
SOX2	23.6742	-1.03091	0.370097	-2.78551	0.0053443	0.0207927
TRAT1	32.439	1.27389	0.212984	5.98115	2.21569e-09	8.52407e-08
FAM181B	14.8803	1.19521	0.266984	4.47669	7.58098e-06	9.49239e-05
CLDND2	2.25208	1.32889	0.260411	5.10304	3.34241e-07	6.45859e-06
SYNM	1285.87	1.34774	0.168333	8.00636	1.18152e-15	5.05253e-13
CRHBP	12.7086	1.00659	0.186585	5.3948	6.85991e-08	1.66594e-06
SYN2	48.5416	1.55763	0.204109	7.63137	2.32278e-14	5.57213e-12
CD5	144.974	1.12003	0.184393	6.07417	1.2463e-09	5.28363e-08
KIR3DL1	1.10397	1.49839	0.30326	4.94095	7.77439e-07	1.34032e-05
CHGA	119.413	3.27036	0.543586	6.01627	1.78479e-09	7.19439e-08
MYT1	84.9807	-1.04199	0.286589	-3.63584	0.000277077	0.00193619
PEG3	703.416	-1.22039	0.217728	-5.60511	2.08118e-08	5.89898e-07
ADCYAP1R1	6.55519	1.62906	0.239326	6.80685	9.97557e-12	9.0847e-10
SPANXB2	2.4607	1.83195	0.697836	2.62518	0.00866021	0.0306009
ARX	18.7197	-1.04077	0.347772	-2.99269	0.00276531	0.0124848
RYR3	14.1158	1.12031	0.145356	7.70734	1.28467e-14	3.46175e-12
EDN3	33.5809	1.73418	0.307546	5.63879	1.71253e-08	4.95398e-07
ENPP2	939.729	1.29595	0.153221	8.45804	2.71918e-17	3.14641e-14
GIPC2	43.6901	1.03222	0.151504	6.81313	9.5498e-12	8.81945e-10
STAB2	9.10429	1.47785	0.249201	5.93037	3.02258e-09	1.09902e-07
SMYD1	24.853	1.48587	0.313787	4.73528	2.1875e-06	3.29735e-05
SLC14A2	19.2667	1.79697	0.234189	7.67315	1.67819e-14	4.23226e-12
GYS2	1.83825	1.98088	0.396898	4.99092	6.00933e-07	1.06591e-05
IKZF3	39.6617	1.25392	0.199491	6.28561	3.26577e-10	1.79444e-08
CRYAB	666.953	1.07614	0.163444	6.58417	4.57421e-11	3.37001e-09
ACAP1	120.335	1.12684	0.177593	6.34508	2.22312e-10	1.32118e-08
C8orf80	14.0205	1.13402	0.196861	5.76051	8.38607e-09	2.67362e-07
C8orf86	4.13655	-1.12831	0.23932	-4.71467	2.42104e-06	3.58887e-05
SLC7A14	1.00107	1.30336	0.292827	4.45095	8.54904e-06	0.000105501
SLC7A10	19.9904	1.76003	0.300866	5.84987	4.91965e-09	1.68303e-07
SELP	237.476	1.14464	0.184403	6.20728	5.39085e-10	2.66441e-08

## Sheet: sheet2
Table S7: Significantly differentially expressed gene in cluster1 and cluster2 samples within luminal B subtype with criteria of |log2FoldChange| > 0.58 & padj < 0.05
	baseMean	log2FoldChange	lfcSE	stat	pvalue	padj
CAMK4	15.171	1.03978	0.205508	5.05957	4.20208e-07	5.68293e-05
SPN	196.981	1.02634	0.195963	5.23742	1.6284e-07	2.71811e-05
HMGCLL1	55.7169	-1.76345	0.42258	-4.17304	3.00556e-05	0.00121059
COL4A4	42.2737	1.07872	0.270779	3.98374	6.78377e-05	0.0022525
COL4A3	6.92645	1.46522	0.369291	3.96765	7.25863e-05	0.00237088
CRTAM	30.2034	1.29076	0.252455	5.11284	3.17359e-07	4.5231e-05
PNOC	12.524	1.55969	0.35769	4.36046	1.29788e-05	0.000644696
IGFBPL1	7.95714	1.16438	0.399518	2.91446	0.00356308	0.037467
SP5	32.4219	-1.50492	0.427086	-3.52371	0.000425557	0.00864552
CFP	15.9051	1.01972	0.242259	4.20922	2.56254e-05	0.00105743
RTBDN	61.6231	-1.71816	0.520879	-3.29859	0.000971724	0.0152783
NRXN1	12.941	-1.55007	0.444054	-3.49072	0.000481729	0.00951543
XPNPEP2	11.0213	1.35029	0.310638	4.34684	1.3811e-05	0.000668634
STXBP6	8.18934	1.03329	0.296818	3.48121	0.000499146	0.00976577
GPR15	2.64227	1.95164	0.393091	4.96486	6.87501e-07	7.81474e-05
TMC3	8.15734	1.48301	0.45897	3.23118	0.00123282	0.0181428
ZMAT4	77.2933	-1.9632	0.502258	-3.90874	9.2778e-05	0.00280881
ZAP70	83.437	1.43421	0.317913	4.51135	6.44169e-06	0.000380101
GSDMA	16.6619	1.18428	0.269723	4.39071	1.12979e-05	0.000582879
DLGAP1	51.0976	-1.14725	0.412477	-2.78137	0.00541308	0.0496748
C2orf85	0.757864	1.92747	0.530891	3.63063	0.000282725	0.0064274
C2orf89	15.9092	1.09635	0.233886	4.68753	2.76528e-06	0.00020743
OR52N4	1.06512	1.45456	0.410158	3.54634	0.000390627	0.00812294
LY6G6C	23.9921	-1.23097	0.401889	-3.06297	0.00219151	0.0268369
LGALS2	17.4409	1.54769	0.363799	4.25423	2.09766e-05	0.000895517
LOC96610	18851.1	1.85079	0.374001	4.94862	7.47427e-07	8.39293e-05
NTRK2	582.095	-1.46172	0.297421	-4.91464	8.89454e-07	9.31062e-05
NTRK3	47.4385	-1.35039	0.372442	-3.62578	0.000288087	0.00650935
BMP5	10.1853	-2.30272	0.629027	-3.66077	0.000251457	0.00586037
PRKCB	148.109	1.47465	0.254158	5.80212	6.54835e-09	2.82158e-06
MPO	2.99767	1.02433	0.299965	3.41485	0.000638177	0.0115394
SLA2	59.0346	1.16853	0.270893	4.31362	1.60602e-05	0.000734723
PRKACB	1619.56	1.98969	0.246334	8.07718	6.62797e-16	4.09344e-12
KCNK9	3.10471	1.01395	0.351949	2.88096	0.00396466	0.0402723
TMEM163	34.0966	1.09382	0.228318	4.79078	1.66132e-06	0.000145882
LOC284276	16.6977	-1.15566	0.377709	-3.05966	0.00221587	0.0270458
CYP26A1	45.2481	1.15414	0.366216	3.15153	0.0016242	0.0216498
NOVA1	568.362	-1.23755	0.372169	-3.32523	0.000883454	0.0143711
TMEM132E	7.36125	-1.06188	0.319532	-3.32322	0.000889833	0.0144495
DIO3	13.5889	1.10415	0.321037	3.43931	0.0005832	0.0109147
CCL21	101.292	1.31256	0.383351	3.42392	0.000617246	0.0112896
CCL23	1.2772	1.00643	0.325672	3.09031	0.00199946	0.025031
CCL25	1.51475	1.74513	0.517451	3.37256	0.000744741	0.0127741
CUX2	11.2598	1.92244	0.357905	5.37137	7.81409e-08	1.72356e-05
ZNF831	36.7154	1.4192	0.283309	5.00937	5.46079e-07	6.65642e-05
RNF157	214.669	-1.11782	0.264635	-4.22401	2.39997e-05	0.00100376
LOC643719	48.8374	4.61048	0.430353	10.7133	8.82043e-27	1.63425e-22
IL2RA	43.777	1.02956	0.23874	4.31248	1.61432e-05	0.000734891
IL2RB	382.226	1.00613	0.23543	4.27358	1.92363e-05	0.000832733
IL2RG	557.897	1.30652	0.244467	5.34436	9.07377e-08	1.89516e-05
SLC17A7	10.7196	1.03984	0.248614	4.18254	2.88265e-05	0.0011687
C16orf54	61.9308	1.2158	0.227598	5.34188	9.19896e-08	1.89516e-05
ATP6V1B1	507.341	-1.12599	0.355965	-3.1632	0.00156043	0.0210934
P2RY8	120.18	1.01575	0.195433	5.19741	2.02084e-07	3.17306e-05
NCF1	107.238	1.00094	0.231186	4.32958	1.49397e-05	0.000699012
FGFR1	3962.89	-1.09027	0.257496	-4.23412	2.29446e-05	0.000966178
STAT4	61.2609	1.15256	0.229951	5.01222	5.38064e-07	6.6442e-05
CCDC151	45.4154	-1.37669	0.304039	-4.528	5.95453e-06	0.000359366
SYT4	12.4398	-5.4972	1.68388	-3.26461	0.00109615	0.0166744
MARCO	39.5091	1.45785	0.461342	3.16003	0.00157753	0.0212725
GPR97	5.43062	1.06565	0.261725	4.07163	4.66851e-05	0.00171623
UNC13A	62.6085	-1.43724	0.399167	-3.60059	0.000317491	0.00699462
ACOXL	5.53532	1.06927	0.381493	2.80287	0.00506506	0.0474272
TTC24	1.62079	1.7144	0.460502	3.7229	0.000196951	0.00487197
IL18RAP	11.5557	1.4672	0.298768	4.91084	9.0686e-07	9.43949e-05
TBX21	22.8248	1.38174	0.301798	4.57837	4.68603e-06	0.000300425
FPR2	7.33313	1.02966	0.282279	3.64766	0.000264634	0.00611365
SYT3	4.96366	1.42847	0.42725	3.34341	0.000827548	0.0137244
VGF	14.361	-1.40706	0.366031	-3.84409	0.000120999	0.00341431
WNT16	1.02031	1.07577	0.33404	3.22048	0.00127977	0.0186266
KRT2	1.06079	1.95376	0.582446	3.35441	0.00079534	0.0133964
FST	162.675	1.06954	0.284509	3.75925	0.000170424	0.00440392
NMNAT2	94.1219	-1.52043	0.355455	-4.27741	1.89084e-05	0.000824319
CNTNAP3	10.6526	1.05538	0.295617	3.57008	0.000356866	0.00756523
KLK2	2.37951	1.61894	0.397803	4.0697	4.70738e-05	0.0017271
KLK3	3.2096	3.06269	0.939849	3.25871	0.00111921	0.0169141
SLC22A3	26.2694	1.34137	0.288416	4.65082	3.30617e-06	0.000234893
SCNN1G	286.892	-1.22219	0.3836	-3.1861	0.00144205	0.0200437
PRF1	107.896	1.1486	0.282658	4.06358	4.83263e-05	0.00175912
EOMES	42.6181	1.53366	0.314627	4.87453	1.09069e-06	0.000105803
KIAA0748	33.8082	1.28587	0.262206	4.90407	9.38733e-07	9.55651e-05
PDE3B	132.506	1.03867	0.269332	3.85648	0.000115031	0.00327389
CNR2	3.66969	2.1633	0.43958	4.92129	8.59753e-07	9.10258e-05
ICOS	47.6953	1.20147	0.267515	4.49121	7.08182e-06	0.000407491
PCSK1	135.009	-3.35892	0.46496	-7.22411	5.0438e-13	1.55753e-09
LOC153328	18.0643	-1.11928	0.402795	-2.77878	0.00545636	0.0499237
PTPRZ1	8.60944	1.69675	0.461408	3.67733	0.000235689	0.00559134
TIGIT	98.7383	1.17053	0.275393	4.25039	2.13398e-05	0.000908927
PI16	70.9389	1.28003	0.458662	2.7908	0.00525784	0.0487402
POU2AF1	158.32	1.82526	0.355088	5.14029	2.74312e-07	4.03369e-05
NGB	2.37218	-2.1324	0.643839	-3.31201	0.000926297	0.0148513
WNT1	1.24447	1.06771	0.366582	2.91262	0.00358415	0.0376543
KCNC2	137.791	-2.66654	0.780786	-3.41521	0.000637338	0.0115394
CYP24A1	26.9047	-3.70977	0.643848	-5.76188	8.31831e-09	3.42492e-06
DCAF12L1	2.18934	3.69332	1.29199	2.85864	0.00425467	0.0422231
CTLA4	45.4518	1.09257	0.264453	4.13141	3.60545e-05	0.00139908
ADCY10	14.0246	-1.30395	0.379768	-3.43355	0.000595741	0.0110114
KCNA2	0.88376	1.6561	0.398788	4.15283	3.28392e-05	0.0013001
KCNA3	27.3574	1.14188	0.267174	4.27391	1.92073e-05	0.000832733
SLFN14	0.93496	1.28445	0.42233	3.04135	0.00235521	0.0283727
PLA2G2D	120.083	2.27354	0.435907	5.21567	1.83156e-07	2.97677e-05
PLA2G2F	0.622019	2.35193	0.795288	2.95733	0.00310317	0.0341219
PARP15	24.4832	1.58944	0.26609	5.97331	2.32494e-09	1.26695e-06
PXDNL	194.256	-1.52035	0.424026	-3.58551	0.000336416	0.00726992
PLEKHB1	606.462	-1.09149	0.304155	-3.5886	0.000332461	0.00720448
DTHD1	5.15745	1.26705	0.330973	3.82826	0.000129054	0.0035582
C22orf41	18.1537	-1.51264	0.29325	-5.15819	2.4935e-07	3.75607e-05
TLR10	29.1147	1.61323	0.26939	5.98845	2.11856e-09	1.18948e-06
SCN3B	9.39919	1.08406	0.25048	4.32793	1.5052e-05	0.000702477
ERMN	42.7527	1.20494	0.290407	4.14915	3.33706e-05	0.00131832
NEB	29.9491	1.01781	0.262262	3.8809	0.000104071	0.00302705
GPR141	18.7425	1.05801	0.249714	4.23688	2.26652e-05	0.00095877
CITED1	31.7319	-1.55459	0.35116	-4.42703	9.554e-06	0.000511609
GDA	1.0438	1.81394	0.650855	2.78702	0.0053196	0.048954
AACSL	1.87713	2.35205	0.593465	3.96325	7.39378e-05	0.00239496
MCOLN3	113.667	-1.45103	0.30384	-4.77564	1.79133e-06	0.000152936
CCDC144NL	1.16009	2.12689	0.636656	3.34073	0.000835593	0.0137961
PTPRC	1109.55	1.14224	0.211567	5.39896	6.70267e-08	1.51448e-05
LOC84740	7.53811	1.27418	0.294232	4.33052	1.48754e-05	0.000699012
BANK1	45.2272	2.03133	0.302108	6.72384	1.76995e-11	2.52259e-08
SIRPG	46.069	1.24511	0.307397	4.05048	5.11132e-05	0.00183532
DOC2A	69.3336	-1.15478	0.259427	-4.45126	8.53694e-06	0.00047357
PAH	66.0388	-1.63959	0.492479	-3.32926	0.000870769	0.0142146
P2RY10	57.865	1.27525	0.279379	4.5646	5.00442e-06	0.000314311
WISP3	4.06303	1.28186	0.448713	2.85676	0.00427996	0.042338
PLP1	27.7428	1.49666	0.412411	3.62905	0.000284469	0.00643545
FCAMR	2.60904	2.9449	0.627793	4.69087	2.72041e-06	0.000204893
SMOC1	35.7736	1.13862	0.336765	3.38105	0.000722093	0.0125388
HEPACAM2	56.1263	-1.88036	0.418574	-4.49231	7.04564e-06	0.000406672
TUBA3C	14.0142	-1.70565	0.457618	-3.72723	0.000193593	0.00480173
TUBA3E	71.9489	-1.58824	0.386868	-4.10539	4.03636e-05	0.00152624
ZNF676	20.5023	-1.40633	0.411845	-3.41471	0.000638501	0.0115394
KLRB1	33.3363	1.41176	0.282813	4.99186	5.98003e-07	7.10243e-05
FLJ45983	509.168	-1.0052	0.274287	-3.66476	0.000247567	0.0057989
ZNF280B	16.2069	1.00497	0.271343	3.70371	0.00021247	0.00514594
ZNF280A	0.687626	2.45718	0.81055	3.0315	0.00243344	0.0290328
GNG4	391.007	-2.28153	0.449753	-5.07286	3.91881e-07	5.45923e-05
IRF4	117.336	1.55462	0.307055	5.06298	4.12755e-07	5.66483e-05
IRF8	303.26	1.01728	0.187724	5.419	5.99343e-08	1.40565e-05
CSF2RB	234.972	1.01017	0.17894	5.64531	1.64887e-08	5.56612e-06
WDR16	4.18957	-1.85441	0.346058	-5.35868	8.38335e-08	1.82737e-05
ITK	119.415	1.48115	0.277582	5.33589	9.50748e-08	1.91472e-05
PYDC1	63.0773	-2.21981	0.633175	-3.50584	0.000455176	0.00909476
C7orf52	1.95919	-2.2628	0.646632	-3.49936	0.000466379	0.0092815
STXBP5L	14.9308	1.51034	0.501635	3.01084	0.00260528	0.0304329
CPB2	0.566769	1.7337	0.623786	2.77931	0.00544743	0.0499159
CPB1	8131.97	-1.96446	0.62652	-3.13551	0.00171555	0.0224952
FCN1	30.8792	1.19277	0.321606	3.70879	0.00020825	0.00510399
CR2	32.6885	2.92413	0.533317	5.48292	4.1837e-08	1.06186e-05
CR1	37.5114	1.60415	0.306207	5.23878	1.61641e-07	2.71811e-05
PTPN7	186.362	1.08368	0.233443	4.64215	3.44798e-06	0.000243002
GPR55	7.0833	1.30026	0.280103	4.64207	3.44935e-06	0.000243002
IL21R	108.593	1.12389	0.247612	4.53892	5.65422e-06	0.00034348
NCRNA00158	0.854172	1.63491	0.512873	3.18775	0.00143383	0.0200386
ADAMTS20	2.86383	-2.28136	0.719615	-3.17025	0.00152308	0.020807
DPY19L2P1	21.2257	-1.2625	0.404595	-3.12039	0.0018061	0.0234996
PDCD1	33.5359	1.1177	0.313452	3.56578	0.000362772	0.007669
KLRD1	36.771	1.21406	0.265297	4.57624	4.73417e-06	0.000302464
IL12B	5.14969	1.07532	0.338037	3.18106	0.00146736	0.0203004
C1orf173	129.429	-2.40306	0.507185	-4.73803	2.15803e-06	0.000170872
ALDH3A1	3.74491	-1.51034	0.442408	-3.41391	0.000640375	0.0115529
PTPRCAP	148.761	1.27871	0.280978	4.55091	5.34133e-06	0.000330635
SLFN12L	14.9338	1.22062	0.25361	4.81298	1.48696e-06	0.000135716
CD48	291.231	1.05154	0.212848	4.94034	7.79859e-07	8.66768e-05
CA14	29.3325	-1.24281	0.311773	-3.98625	6.71251e-05	0.00223944
CA11	121.112	-1.12155	0.265799	-4.21956	2.44779e-05	0.00101916
CA10	1.54833	3.4634	0.938936	3.68865	0.000225451	0.00538293
MCF2	1.04312	1.21008	0.396067	3.05525	0.00224874	0.0274109
CDO1	38.3901	1.06931	0.218111	4.90261	9.45731e-07	9.57514e-05
C5orf46	42.6232	1.04645	0.308197	3.39541	0.000685258	0.0120699
KCNG3	18.4012	-1.18457	0.267283	-4.43191	9.34025e-06	0.00050307
DMBT1	9.68407	2.04259	0.592445	3.44774	0.000565308	0.0106987
LCN12	35.2869	-1.12557	0.312221	-3.60506	0.000312085	0.00690837
SHISA3	1.45843	1.0626	0.314783	3.37567	0.00073636	0.0127032
MCTP2	67.7263	1.07462	0.251019	4.28101	1.86049e-05	0.000818793
LRRN2	620.429	-1.00115	0.223259	-4.48427	7.31643e-06	0.000417104
SH3RF2	60.2265	-1.0163	0.307734	-3.30254	0.000958145	0.0151592
FAM159A	7.8221	1.06719	0.241486	4.41927	9.90339e-06	0.00052879
XCL2	13.1885	1.33999	0.311653	4.29963	1.71084e-05	0.000771252
CYP11A1	9.9952	1.11036	0.274459	4.04564	5.21806e-05	0.00186641
DCX	17.7796	-1.62202	0.524409	-3.09303	0.00198121	0.0248856
FCER2	3.69753	1.56417	0.529147	2.95601	0.00311642	0.0342271
NTSR1	4.03314	1.55425	0.393554	3.94927	7.83909e-05	0.00248505
FAM196A	358.252	-1.77714	0.438943	-4.04868	5.15067e-05	0.00184587
MS4A15	89.9101	-1.33787	0.401641	-3.33101	0.00086531	0.0141505
CD79B	54.5916	1.32571	0.274169	4.83537	1.32897e-06	0.000123116
CD79A	198.275	2.14382	0.387818	5.5279	3.24085e-08	9.53119e-06
CBLN1	17.9925	1.11622	0.376639	2.96362	0.00304039	0.0338129
IDO1	222.265	1.13542	0.339975	3.33973	0.000838599	0.0137989
NLRP12	16.288	1.01438	0.280158	3.62075	0.000293749	0.00659706
PLAG1	28.257	1.31626	0.231827	5.67778	1.36453e-08	5.15958e-06
TDRD9	9.38578	1.96889	0.277851	7.08613	1.37915e-12	3.65041e-09
CD28	79.5937	1.06548	0.196429	5.42427	5.81909e-08	1.38226e-05
CD27	133.611	1.15165	0.282602	4.07515	4.59848e-05	0.00169723
ULBP3	10.2597	1.02221	0.295019	3.46488	0.000530465	0.0101744
CACNB4	73.6186	-1.02556	0.290609	-3.52901	0.000417117	0.00850202
HSD11B1	38.5863	1.29244	0.262452	4.92448	8.45852e-07	9.01399e-05
HSF5	1.90867	1.32023	0.299176	4.4129	1.01994e-05	0.000541475
CXCL11	337.038	1.14503	0.294742	3.88483	0.0001024	0.00299324
CXCL10	1002.8	1.03841	0.258737	4.01337	5.98577e-05	0.00208467
BSN	111.201	-1.24253	0.286531	-4.33648	1.44783e-05	0.000687829
OXTR	233.105	-1.42993	0.279923	-5.10829	3.25079e-07	4.59776e-05
TIMD4	10.2488	1.2396	0.328883	3.76911	0.000163829	0.00427516
SEZ6L	74.1435	-2.69781	0.520358	-5.18454	2.16551e-07	3.37165e-05
SFTPB	2.73503	1.25032	0.393597	3.17666	0.00148984	0.0205232
SCRT1	3.40073	-1.49997	0.524694	-2.85876	0.00425301	0.0422231
STK33	7.61515	1.50044	0.365335	4.10703	4.00773e-05	0.00151851
S1PR4	27.6961	1.23358	0.250227	4.92985	8.22928e-07	8.9165e-05
C12orf60	61.925	-1.2578	0.237283	-5.30083	1.15278e-07	2.17946e-05
C12orf69	22.7036	-1.37599	0.367422	-3.74499	0.000180402	0.00457248
RGL4	7.82258	1.29628	0.248066	5.22555	1.73642e-07	2.84712e-05
CTSW	82.583	1.22358	0.303191	4.03566	5.44483e-05	0.0019326
CXCL9	2535.94	1.47713	0.341687	4.32304	1.53893e-05	0.000716415
AFF3	3761.9	-1.10485	0.249218	-4.43326	9.28194e-06	0.000501387
HMP19	40.8337	-2.54841	0.498034	-5.11693	3.10549e-07	4.46035e-05
IL2	0.572286	1.76458	0.550547	3.20514	0.00134997	0.019255
BIRC3	388.603	1.01776	0.202383	5.02887	4.93372e-07	6.30427e-05
EPO	16.9037	1.40804	0.492196	2.86073	0.00422672	0.0420984
KCNK3	215.898	-2.17569	0.487684	-4.46127	8.14741e-06	0.000454684
CXorf59	2.30775	1.38033	0.474949	2.90627	0.00365766	0.0382013
LYZ	4498.91	1.32651	0.259753	5.10679	3.27674e-07	4.59935e-05
SYCE1	3.75229	1.81764	0.483712	3.7577	0.000171485	0.00441902
LY9	44.8801	1.45322	0.283503	5.12595	2.96047e-07	4.28528e-05
ZNF215	17.3732	1.16796	0.218988	5.33345	9.6364e-08	1.91982e-05
TDRD12	1.79169	1.01616	0.356598	2.84961	0.00437735	0.0429939
PSTPIP1	65.215	1.15156	0.269907	4.26651	1.98554e-05	0.000853554
PLAC1	46.2614	-1.17647	0.299139	-3.93287	8.39377e-05	0.00260066
TUBA3D	151.61	-2.36342	0.424146	-5.57219	2.5156e-08	8.32306e-06
RRAD	15.6474	1.26496	0.293022	4.31696	1.58195e-05	0.000727303
PYHIN1	39.037	1.41644	0.299685	4.72644	2.28494e-06	0.000177706
SNTN	6.53832	-1.85521	0.393405	-4.71579	2.40774e-06	0.000185106
C5orf20	18.982	1.61179	0.338155	4.76642	1.87529e-06	0.000156511
GRIN2A	12.0557	1.11393	0.256837	4.33711	1.44368e-05	0.000687829
GFI1	30.47	1.00987	0.248508	4.06375	4.82905e-05	0.00175912
SLITRK2	2.74449	1.2181	0.274448	4.43838	9.06385e-06	0.000495384
PAPPA	83.9309	1.16344	0.209311	5.55844	2.72203e-08	8.54811e-06
SLC39A6	41174	-1.00338	0.252941	-3.96685	7.28296e-05	0.00237088
GZMA	130.932	1.26211	0.287413	4.39126	1.12697e-05	0.000582879
GZMB	66.769	2.23149	0.339406	6.5747	4.8752e-11	6.45198e-08
GZMM	21.0433	1.46581	0.335476	4.36935	1.24616e-05	0.000625715
GZMH	37.9723	1.18082	0.317487	3.71926	0.00019981	0.00492953
GZMK	156.033	1.55132	0.307424	5.04618	4.5074e-07	5.8812e-05
MAP4K1	124.028	1.16802	0.257158	4.54202	5.57185e-06	0.00033959
MIR155HG	25.1766	1.3336	0.227162	5.87072	4.33902e-09	2.06137e-06
B4GALNT2	29.3011	-1.69533	0.524741	-3.2308	0.00123446	0.0181524
FUT7	10.9458	1.12204	0.262811	4.26936	1.96033e-05	0.000846643
MAGEA9B	1.49237	2.97475	0.855714	3.47634	0.000508308	0.00989119
HGC6.3	1.43705	3.10404	0.651696	4.76301	1.90724e-06	0.000157756
MT1G	206.688	-1.24916	0.407195	-3.06771	0.00215704	0.0265376
CADM3	25.685	1.12104	0.317286	3.53323	0.000410522	0.00840018
SLAMF7	421.313	1.20215	0.275268	4.3672	1.2585e-05	0.000630202
SLAMF6	124.92	1.5459	0.284376	5.4361	5.44591e-08	1.34188e-05
SLAMF1	40.3096	1.54979	0.281738	5.5008	3.78065e-08	1.06133e-05
C6orf105	20.388	1.10731	0.257581	4.29888	1.71665e-05	0.000771995
FCRL1	4.22233	1.70379	0.438591	3.88469	0.000102459	0.00299324
FCRL2	7.74551	1.67581	0.419097	3.99862	6.37141e-05	0.00217804
FCRL3	29.3895	2.19144	0.356357	6.14957	7.76922e-10	5.33141e-07
FCRL6	18.0014	1.2817	0.284231	4.50936	6.50243e-06	0.000382467
FCRLA	32.5093	2.61002	0.360485	7.24029	4.47716e-13	1.55753e-09
VTN	14.4369	-1.65116	0.348476	-4.73823	2.15594e-06	0.000170872
MMP9	1905.82	1.11059	0.267143	4.1573	3.22035e-05	0.00127766
MMP3	237.151	1.22694	0.305823	4.01195	6.02202e-05	0.00209336
AMICA1	120.045	1.17252	0.239604	4.89357	9.90227e-07	9.86393e-05
TNIP3	6.77462	1.1202	0.34187	3.27669	0.00105032	0.0160963
SCNN1B	379.876	-1.02772	0.32209	-3.19079	0.00141887	0.0199209
LAX1	60.9607	1.18895	0.315473	3.76877	0.000164057	0.00427516
SERPINF2	54.0564	1.26882	0.243961	5.20089	1.98333e-07	3.16786e-05
SLC5A7	8.0199	-2.17803	0.770773	-2.82578	0.00471659	0.0453027
TRIM9	105.836	-1.71367	0.31172	-5.49747	3.85272e-08	1.06186e-05
LOC100233209	23.8046	1.03442	0.226725	4.56244	5.05624e-06	0.000316493
TMIGD2	3.00051	1.57075	0.365537	4.29711	1.73037e-05	0.000776027
FCRL4	2.99912	2.38404	0.440351	5.41395	6.1648e-08	1.42632e-05
FCRL5	85.2527	1.82313	0.419485	4.3461	1.38577e-05	0.000668634
UBD	767.786	1.01586	0.357291	2.84323	0.00446581	0.0434817
C1QL1	25.6059	-1.49309	0.284249	-5.25276	1.49838e-07	2.60043e-05
HECW1	9.20887	1.17811	0.307832	3.82712	0.000129651	0.00356936
EPHA3	300.053	1.87231	0.350016	5.34921	8.83396e-08	1.88133e-05
COL29A1	3.92572	1.71606	0.508475	3.37492	0.000738381	0.0127248
LIMD2	328.668	1.0239	0.215339	4.75484	1.98604e-06	0.00016282
TF	39.255	1.02528	0.34781	2.94783	0.00320011	0.0348774
KCNJ12	35.6285	1.69384	0.261441	6.47888	9.2409e-11	1.0701e-07
KCNJ10	35.2976	1.25105	0.311106	4.02129	5.78799e-05	0.00203106
PI15	289.991	-1.7219	0.373419	-4.61117	4.004e-06	0.000264007
MMP1	674.933	1.19888	0.378743	3.16541	0.00154866	0.0209955
COL22A1	55.6878	1.07042	0.285321	3.75163	0.000175687	0.00449603
TOX	53.5407	1.17329	0.257946	4.54858	5.40083e-06	0.000332447
IGSF1	136.02	-2.26638	0.488686	-4.6377	3.52306e-06	0.000244476
AICDA	1.23551	1.52149	0.43702	3.48151	0.000498592	0.00976523
MAT1A	74.75	-1.22024	0.430256	-2.83608	0.00456709	0.0441644
GJB7	5.32801	2.51481	0.751967	3.34431	0.000824883	0.0137136
SLC12A3	5.34071	1.98847	0.351847	5.65153	1.59023e-08	5.56612e-06
GRIA1	7.81424	-1.95159	0.539677	-3.61622	0.000298939	0.0066893
JSRP1	6.53098	1.62181	0.395948	4.09601	4.20333e-05	0.00156808
SLC30A8	761.404	1.7773	0.587948	3.02288	0.0025038	0.0295857
SCN1A	2.14514	1.71212	0.605103	2.82946	0.00466262	0.0448367
TRPM8	2.39939	2.45011	0.420198	5.83086	5.51437e-09	2.43263e-06
TP53TG3B	2.11501	1.33823	0.450477	2.9707	0.00297117	0.0333232
PEX5L	33.605	-1.94043	0.388683	-4.99232	5.96584e-07	7.10243e-05
OLFM3	5.76877	-5.04499	1.41304	-3.5703	0.00035657	0.00756523
CCR2	94.594	1.29483	0.269533	4.80399	1.55531e-06	0.000139211
CCR4	40.9411	1.20685	0.238457	5.06105	4.16952e-07	5.68036e-05
CCR5	274.387	1.0145	0.224725	4.51438	6.35021e-06	0.000377105
CCR7	120.108	1.45015	0.280578	5.16845	2.36048e-07	3.61446e-05
SLC8A2	28.8112	-1.35978	0.445501	-3.05224	0.00227138	0.0276505
ZBED2	25.7003	1.32816	0.325823	4.07633	4.57512e-05	0.00169197
CD8A	280.177	1.11904	0.265543	4.21414	2.50737e-05	0.00104163
CD8B	66.2238	1.23281	0.300821	4.09816	4.16448e-05	0.00156193
HLA-DOB	56.0278	1.54173	0.279387	5.51824	3.42405e-08	9.91261e-06
ESRRG	202.313	-1.12689	0.343459	-3.28102	0.00103434	0.0159436
HLA-DQA1	2234.64	1.04164	0.2485	4.19168	2.7689e-05	0.0011325
DOK7	202.069	-1.03572	0.337719	-3.06683	0.00216345	0.0265945
CACNA2D2	492.142	-1.10117	0.24957	-4.41227	1.0229e-05	0.000541496
ZNF80	4.8192	1.00449	0.301052	3.33659	0.000848131	0.0139041
RAB3C	4.33708	-1.97838	0.508008	-3.8944	9.84433e-05	0.00292301
XCL1	11.0623	1.07289	0.299245	3.58533	0.000336658	0.00726992
CHRNA9	19.0594	-1.85423	0.55576	-3.33639	0.000848742	0.0139041
ANKRD1	5.10493	1.05447	0.363226	2.90308	0.00369514	0.0384411
DISP2	119.995	-1.20791	0.327436	-3.68899	0.000225149	0.00538266
TLR9	21.5501	1.09015	0.235906	4.62112	3.81672e-06	0.000256266
ABCD2	17.4644	1.00694	0.279378	3.60421	0.000313105	0.00691443
PI3	1.91463	1.0884	0.377098	2.88625	0.00389862	0.0399301
GRAP2	43.404	1.17028	0.244673	4.78302	1.7268e-06	0.00014881
DSEL	420.166	-1.2315	0.266629	-4.61877	3.8603e-06	0.000258208
CCDC85A	68.0657	-1.12385	0.262133	-4.28733	1.80838e-05	0.000803491
C9orf117	26.5685	-1.0228	0.235377	-4.34536	1.39047e-05	0.00066916
TCL1A	17.8927	2.5375	0.462184	5.49023	4.014e-08	1.06186e-05
RELN	13.5893	1.11017	0.337659	3.28784	0.00100959	0.0156664
FAM135B	93.5255	-1.47369	0.463293	-3.1809	0.00146819	0.0203004
MAL	11.6245	1.71583	0.320338	5.3563	8.4945e-08	1.83007e-05
EPHX4	95.838	-1.33563	0.342768	-3.8966	9.7553e-05	0.00290589
TEX11	3.13724	1.08364	0.301393	3.59545	0.000323836	0.00706718
ARHGAP36	18.1869	-2.01412	0.698485	-2.88356	0.00393206	0.0400733
LYVE1	34.7038	1.10072	0.211414	5.20645	1.92488e-07	3.10124e-05
CACNA1E	4.72263	1.14467	0.260804	4.38899	1.1388e-05	0.000584479
CACNA1F	22.9892	-1.15346	0.350195	-3.29377	0.000988524	0.0154452
KIF19	6.73339	2.0995	0.329714	6.36762	1.91983e-10	1.77853e-07
PAX5	5.49361	1.37899	0.476506	2.89396	0.00380419	0.0393765
SNAP25	52.3157	-1.62448	0.409849	-3.96361	7.38247e-05	0.00239496
VEPH1	54.1014	-1.04477	0.279632	-3.73624	0.000186794	0.00470233
KCNJ3	1135.48	-1.84643	0.536733	-3.44012	0.000581446	0.0109039
GPR26	69.7851	-2.31987	0.63897	-3.63064	0.00028272	0.0064274
SLC34A2	187.021	-2.06814	0.501689	-4.12236	3.75011e-05	0.00143798
PPP1R16B	163.547	1.06732	0.214744	4.97018	6.68893e-07	7.69767e-05
SOCS1	55.0263	1.02273	0.223957	4.56666	4.95569e-06	0.000312309
MYOZ2	1.97933	-1.61241	0.458697	-3.51519	0.000439442	0.00884344
P2RX1	20.5386	1.02105	0.321545	3.17544	0.00149612	0.0205639
GSTP1	1407.26	1.28798	0.208669	6.17237	6.7273e-10	4.98574e-07
IFNG	8.53008	2.24317	0.427079	5.25234	1.50176e-07	2.60043e-05
IL7R	111.548	1.38719	0.27511	5.04231	4.59945e-07	5.91796e-05
LRMP	81.503	1.40718	0.22529	6.24607	4.20905e-10	3.39066e-07
RBM20	84.4423	1.66461	0.341794	4.87022	1.11474e-06	0.000107015
CLSTN2	2138.47	-1.32676	0.279607	-4.74509	2.08418e-06	0.000167168
PPP1R14D	9.19107	1.58045	0.32879	4.80687	1.53312e-06	0.000137892
FAM65B	132.929	1.46218	0.223299	6.54807	5.82864e-11	7.19953e-08
XCR1	2.46452	1.05076	0.332676	3.15851	0.00158578	0.0213527
PADI3	26.0711	1.99098	0.45493	4.37644	1.20633e-05	0.000612351
ZFP57	18.9533	2.12251	0.545417	3.89154	9.96098e-05	0.00294964
GPR133	43.1255	1.00052	0.281575	3.55331	0.000380415	0.00798226
TNFRSF13C	5.28438	1.39281	0.302621	4.6025	4.17458e-06	0.00027331
HAL	11.0906	-1.34269	0.418911	-3.2052	0.0013497	0.019255
TRAF3IP3	133.042	1.00039	0.204376	4.89485	9.83788e-07	9.86393e-05
LCK	165.276	1.23751	0.271954	4.55043	5.35355e-06	0.000330635
GSTM5	36.0662	1.11166	0.260938	4.26026	2.04186e-05	0.000875733
LPAR3	21.7643	-1.77664	0.471262	-3.76997	0.000163267	0.00426659
GDF9	43.4217	-1.36993	0.271201	-5.05135	4.38691e-07	5.80576e-05
GDF6	15.3296	1.06742	0.284285	3.75477	0.000173503	0.00445861
LTB	100.122	1.60204	0.343675	4.66148	3.13945e-06	0.000226334
CYP26C1	0.598739	1.46069	0.465679	3.13669	0.00170865	0.0224364
MS4A1	111.829	2.45601	0.406356	6.04397	1.50368e-09	9.45247e-07
C20orf26	31.4674	-1.02091	0.265822	-3.84057	0.000122748	0.00343546
FASLG	26.1134	1.0903	0.309541	3.52231	0.000427806	0.00868169
CCDC67	3.18449	1.27576	0.340332	3.74858	0.00017784	0.00454484
LSAMP	19.1084	1.1909	0.278226	4.28032	1.86627e-05	0.00081939
CCL13	20.5721	1.60774	0.33321	4.82501	1.39994e-06	0.000128406
CCL18	114.871	1.33092	0.350142	3.80109	0.000144063	0.00385722
CCL19	210.582	2.07724	0.392917	5.28672	1.24528e-07	2.28441e-05
MTUS2	12.6667	-1.17174	0.360515	-3.25019	0.0011533	0.0171909
RNF165	50.0113	-1.08459	0.262882	-4.12577	3.6949e-05	0.00142327
AMTN	0.839731	-1.97113	0.655001	-3.00936	0.002618	0.0304497
TAT	148.448	-1.99118	0.537758	-3.70275	0.000213278	0.00515876
ATRNL1	261.333	-1.33614	0.436454	-3.06135	0.0022034	0.0269291
PRG4	143.2	1.59223	0.398648	3.99407	6.49477e-05	0.00219959
BLK	10.4669	2.01105	0.429168	4.68593	2.78689e-06	0.000208207
LTA	19.7877	1.30773	0.275426	4.74802	2.05418e-06	0.000165477
DAB1	11.9601	-3.97794	0.516266	-7.70521	1.30624e-14	6.05052e-11
GTSF1L	0.905364	1.54133	0.465854	3.30862	0.000937576	0.0149883
KCNC1	40.6957	-2.04738	0.467884	-4.37583	1.20971e-05	0.000612389
MGC29506	361.479	1.02101	0.341268	2.9918	0.00277333	0.0317187
NCF1B	23.348	1.09238	0.243452	4.48703	7.22217e-06	0.00041428
HSD17B13	2.72152	1.11725	0.338486	3.30073	0.000964334	0.0152191
DNAH8	2.5362	1.40572	0.320414	4.3872	1.1482e-05	0.000587675
MYBPC2	1.25249	1.43037	0.472655	3.02624	0.00247614	0.0293338
MYBPC1	38.4141	-1.76195	0.526872	-3.34418	0.000825275	0.0137136
CDKL2	33.2979	-1.1351	0.395862	-2.86742	0.00413829	0.0414232
AIM2	34.9754	1.30199	0.278752	4.67079	3.0004e-06	0.000219729
SCGB1D2	2493.63	1.88613	0.529944	3.55911	0.000372119	0.00784371
POU2F2	90.8766	1.16571	0.192962	6.04112	1.53052e-09	9.45247e-07
CLNK	0.776439	1.4948	0.503884	2.96656	0.00301152	0.0336129
P2RY4	2.30026	-1.36009	0.403142	-3.37373	0.00074158	0.012734
MS4A8B	32.1659	-1.533	0.495599	-3.09324	0.00197986	0.0248856
SPATA22	0.980391	1.38508	0.488712	2.83415	0.00459485	0.0443865
GPR171	32.5808	1.5839	0.291723	5.42945	5.65285e-08	1.36021e-05
GPR174	15.0304	1.39054	0.29763	4.67205	2.9821e-06	0.000219255
C2CD4A	83.1529	1.61194	0.47683	3.38053	0.00072347	0.012551
PDZK1	593.255	-1.63218	0.406027	-4.01989	5.82257e-05	0.00203933
CEACAM21	20.8344	1.26679	0.250474	5.05757	4.24638e-07	5.70122e-05
SP140	105.796	1.16582	0.222169	5.24746	1.5421e-07	2.62128e-05
PDE6A	1.92589	1.11356	0.323324	3.44411	0.000572939	0.0107933
RMST	1.83048	-3.15096	0.65645	-4.80001	1.5866e-06	0.000141329
CASP5	2.14773	1.15299	0.33169	3.4761	0.00050876	0.00989119
TDRD1	30.9736	3.5938	0.512126	7.01741	2.26011e-12	4.6528e-09
ZACN	0.861409	-1.30739	0.400991	-3.2604	0.00111254	0.0168683
CLEC6A	2.09203	1.73326	0.580403	2.9863	0.00282373	0.032038
CD22	199.119	1.11023	0.240674	4.61302	3.96864e-06	0.00026261
GPM6A	27.0352	1.36724	0.442572	3.08931	0.0020062	0.0250816
PPP2R2B	10.3264	1.13221	0.239615	4.72512	2.29983e-06	0.000177706
SH2D1A	74.2323	1.45783	0.299932	4.86054	1.17068e-06	0.000111232
IPCEF1	54.5849	1.16002	0.208462	5.56464	2.62687e-08	8.3915e-06
TNNT3	3.67504	1.43036	0.432849	3.30452	0.00095139	0.0151048
MSH4	2.00812	-1.10478	0.391569	-2.82143	0.00478104	0.0456849
ANPEP	1738.17	-1.05294	0.320971	-3.28049	0.00103627	0.0159602
PLAC8	29.6655	1.81086	0.310346	5.83497	5.38011e-09	2.43129e-06
CHRDL1	137.501	1.02575	0.341086	3.0073	0.0026358	0.0306182
GPR158	79.6999	-1.15922	0.40092	-2.8914	0.00383534	0.0395224
TMEM151A	10.3626	-1.41533	0.438221	-3.22973	0.00123909	0.018206
SCARA5	23.6676	1.38821	0.415642	3.33992	0.00083804	0.0137989
LOC100188949	7.99351	1.45814	0.274655	5.309	1.10229e-07	2.14982e-05
SLCO5A1	7.43138	1.20424	0.289358	4.16175	3.15817e-05	0.00126109
GDAP1L1	2.84858	-1.68284	0.458365	-3.6714	0.000241228	0.00569358
VSIG2	70.9663	-1.49153	0.516732	-2.88648	0.00389583	0.0399237
CD70	11.2722	1.16909	0.307329	3.80404	0.000142354	0.00382252
BTLA	28.8023	1.96379	0.31767	6.18184	6.33607e-10	4.89145e-07
ASCL1	270.897	-3.13333	0.67367	-4.65113	3.30123e-06	0.000234893
ASCL4	5.00458	2.44173	0.497467	4.90832	9.18577e-07	9.45522e-05
CD244	12.4537	1.08416	0.258841	4.18852	2.80774e-05	0.00114083
CD247	89.3735	1.13134	0.271784	4.16265	3.14569e-05	0.00125882
CLEC4E	29.3662	1.25164	0.323373	3.87058	0.000108575	0.00312458
CLEC4D	2.2844	1.46931	0.415552	3.53579	0.000406562	0.00833273
CLEC4C	1.67018	2.47035	0.585028	4.22262	2.4148e-05	0.00100769
UGT2B4	12.5457	1.84194	0.59549	3.09315	0.00198044	0.0248856
TRIM74	1.01698	-1.40672	0.446489	-3.15063	0.00162921	0.021699
KLRC1	9.00548	1.15643	0.373707	3.09449	0.00197149	0.0248488
XIRP1	43.0139	1.48503	0.33301	4.45942	8.21829e-06	0.000457263
SMTNL2	4.90651	1.28467	0.370657	3.46591	0.000528432	0.0101564
MAGEC2	15.0209	-2.9381	0.909012	-3.23219	0.00122845	0.0180928
SLC12A5	10.7504	-1.13328	0.362446	-3.12675	0.00176751	0.023046
MCHR1	35.1259	-1.39834	0.354041	-3.94966	7.82615e-05	0.00248505
GFRA3	4.76609	-1.12311	0.362539	-3.09789	0.00194906	0.0246316
PRSS45	2.20882	-1.45964	0.498228	-2.92966	0.00339336	0.0362794
CPA6	97.9921	-1.64418	0.536984	-3.06189	0.00219944	0.0268985
TPTE2P3	1.78949	-1.53942	0.552336	-2.7871	0.00531821	0.048954
CD52	348.793	1.15462	0.233092	4.95348	7.28987e-07	8.23577e-05
DACH2	1.7824	1.28015	0.427342	2.99562	0.0027389	0.031383
CD226	27.5085	1.04928	0.209396	5.011	5.41491e-07	6.6442e-05
FAM123C	6.98292	-3.58241	0.920897	-3.89014	0.000100188	0.00295588
CD40LG	24.8279	1.63821	0.290093	5.64719	1.63094e-08	5.56612e-06
KIAA0125	22.991	2.15556	0.392732	5.48862	4.05086e-08	1.06186e-05
ZNF683	52.927	1.14827	0.295222	3.88951	0.000100447	0.00295609
CHI3L2	165.945	-1.00502	0.340984	-2.94742	0.00320439	0.0348959
THEMIS	35.4081	1.37492	0.278324	4.93999	7.81251e-07	8.66768e-05
DHX40P1	1.06363	-2.35692	0.559819	-4.21014	2.5521e-05	0.00105642
GABRA3	8.56587	2.43785	0.865215	2.81763	0.00483799	0.046134
AFP	32.7012	-2.74947	0.632072	-4.34993	1.36179e-05	0.000667694
GPR114	28.4729	1.43323	0.287516	4.98488	6.20001e-07	7.27049e-05
NXPH2	5.02626	-2.12141	0.51466	-4.12198	3.75637e-05	0.00143798
LGR5	20.1326	1.00945	0.337984	2.98667	0.00282037	0.032038
AMPD1	4.64892	1.26259	0.411877	3.06546	0.00217334	0.0266673
TRIM55	6.4871	3.13167	0.484339	6.46586	1.00725e-10	1.09778e-07
LOC146336	7.63903	-3.71718	0.869771	-4.27374	1.92221e-05	0.000832733
CCL5	825.894	1.18943	0.269413	4.41488	1.01065e-05	0.000538083
CD38	66.0065	1.32125	0.347173	3.80574	0.000141381	0.00380189
TXNDC3	4.3775	1.10182	0.266364	4.13652	3.52606e-05	0.00137829
LHFPL4	6.20918	-3.06017	0.703839	-4.34782	1.37496e-05	0.000668634
MASP1	2.94133	1.15794	0.294832	3.92745	8.58524e-05	0.00263357
GLT1D1	4.17644	1.20088	0.278326	4.31466	1.59851e-05	0.0007331
CD3D	106.502	1.36615	0.284112	4.80848	1.52084e-06	0.000137475
CD3E	312.925	1.37467	0.274959	4.99953	5.74698e-07	6.91709e-05
CD3G	42.1011	1.3825	0.288766	4.7876	1.68789e-06	0.000146823
LAIR2	2.75361	1.27346	0.344904	3.69221	0.000222314	0.00532632
FRAS1	130.911	-1.00349	0.300156	-3.34321	0.000828142	0.0137244
GVIN1	107.449	1.25388	0.226696	5.53113	3.18181e-08	9.50848e-06
LOC154822	11.0999	1.37785	0.353251	3.90049	9.59982e-05	0.00287808
ADRB1	9.90768	-1.15907	0.380462	-3.04647	0.00231545	0.028003
FXYD2	2.24281	1.31008	0.388797	3.36957	0.000752853	0.0128561
ADAM6	25635.7	1.74528	0.344367	5.0681	4.01816e-07	5.55586e-05
IL22RA2	3.85149	1.84913	0.416971	4.43466	9.22171e-06	0.000501055
CYTIP	210.075	1.30194	0.216798	6.0053	1.90984e-09	1.1058e-06
TMEM61	30.5413	-1.18185	0.273646	-4.31889	1.56813e-05	0.000726359
TNFRSF9	22.0193	1.06648	0.269144	3.96249	7.41734e-05	0.00239823
TREML2	6.43222	2.15629	0.349975	6.16126	7.21678e-10	5.14279e-07
UGT2B11	102.261	4.05229	0.57524	7.04451	1.86114e-12	4.31041e-09
S100A9	811.64	1.29674	0.406552	3.1896	0.00142468	0.0199671
PDZK1P1	65.7685	-2.47698	0.358352	-6.91214	4.77397e-12	8.84522e-09
WDR63	11.1779	-1.25613	0.317519	-3.95608	7.61891e-05	0.00242966
TMPRSS9	7.07083	-1.44634	0.381373	-3.79244	0.000149173	0.0039711
KCNE1L	3.91771	2.24248	0.424019	5.28863	1.23238e-07	2.28336e-05
TEDDM1	1.64297	-1.02221	0.32661	-3.12975	0.00174954	0.0228439
TBC1D10C	91.284	1.24004	0.268255	4.62262	3.78925e-06	0.000256231
CD1E	24.6332	1.59363	0.287304	5.54684	2.90881e-08	8.9824e-06
JAK3	234.412	1.20213	0.212957	5.64495	1.65229e-08	5.56612e-06
GRM4	228.058	-1.34049	0.378351	-3.54299	0.000395614	0.00819289
HOXB6	196.059	-1.14887	0.352947	-3.25508	0.0011336	0.0170146
CD19	18.5799	2.32113	0.480407	4.8316	1.35443e-06	0.00012485
NCRNA00189	0.737907	1.26327	0.414618	3.04684	0.00231264	0.0279873
CYP2C8	12.4657	-1.15642	0.386471	-2.99226	0.0027692	0.0317105
VPREB3	8.20246	1.38016	0.303707	4.54437	5.51011e-06	0.000338051
KLRK1	80.2912	1.31169	0.276113	4.75055	2.02865e-06	0.000164398
LOC440173	2.46923	1.61061	0.496048	3.24689	0.00116673	0.0173493
ENTHD1	6.51356	1.76004	0.319527	5.50825	3.62411e-08	1.03304e-05
RSPO4	14.8442	1.37347	0.427227	3.21485	0.00130512	0.0188916
C1orf111	4.14498	-1.07847	0.373401	-2.88823	0.00387421	0.0398122
SOX2OT	3.60532	-1.17914	0.324118	-3.638	0.00027476	0.00626939
CEACAM4	1.21798	1.07652	0.311329	3.4578	0.0005446	0.0104024
TSHR	6.34102	1.00412	0.296814	3.38301	0.000716968	0.0124849
SCML4	33.3744	1.69054	0.308152	5.48607	4.10984e-08	1.06186e-05
ZNF208	68.8749	-1.07079	0.306305	-3.49583	0.000472594	0.00938357
CDHR1	8.63375	1.1109	0.337733	3.28929	0.00100439	0.0155988
WNT10A	14.6517	1.01067	0.243897	4.14383	3.41559e-05	0.00134361
KRT81	78.3701	2.18735	0.341931	6.39706	1.58396e-10	1.63043e-07
DPP6	1.66285	1.34095	0.413045	3.2465	0.00116835	0.0173595
CYP2A6	312.294	-3.24409	0.680966	-4.76395	1.89844e-06	0.000157732
TMC8	234.31	1.12503	0.212719	5.2888	1.23123e-07	2.28336e-05
PCDHA9	4.6161	-1.16694	0.400852	-2.91114	0.0036011	0.0377382
ADAMDEC1	235.807	1.06765	0.30783	3.46832	0.000523723	0.010104
CCR6	58.7029	1.0691	0.197547	5.41191	6.23554e-08	1.42632e-05
OLFM4	81.3655	3.31596	0.529383	6.26382	3.75667e-10	3.1638e-07
SLC26A3	19.4598	-1.94393	0.483287	-4.02232	5.76287e-05	0.00203106
MIXL1	1.05458	1.70469	0.597846	2.85139	0.0043529	0.0428764
PRKCQ	34.2178	1.51377	0.275978	5.4851	4.13226e-08	1.06186e-05
FAM129C	5.29691	2.07246	0.341627	6.06643	1.30781e-09	8.65396e-07
CXorf65	1.26089	2.00304	0.515663	3.88439	0.000102586	0.00299324
SCGN	9.71002	-1.81429	0.539217	-3.36468	0.000766326	0.0130375
VWA5B2	24.8424	-1.06643	0.355995	-2.99562	0.0027389	0.031383
ASTN2	441.025	-1.18629	0.223153	-5.31603	1.06056e-07	2.09043e-05
NEFH	97.9271	1.04303	0.312043	3.34259	0.000829994	0.0137427
SPIB	24.3793	2.43832	0.357747	6.81576	9.37643e-12	1.57933e-08
RASGRP2	47.4875	1.50622	0.254056	5.9287	3.05337e-09	1.57147e-06
S100G	8.24755	3.45582	1.19804	2.88457	0.00391949	0.0400278
TMEM90A	1.57449	1.01665	0.36447	2.7894	0.00528054	0.0487738
CXCR3	84.8483	1.23144	0.281532	4.37405	1.2196e-05	0.000615715
CXCR6	88.3349	1.21764	0.25141	4.84326	1.27729e-06	0.000119523
CXCR5	28.1663	1.90023	0.322604	5.89027	3.85573e-09	1.87997e-06
ANK1	79.6331	-1.52432	0.399071	-3.81967	0.000133629	0.00364635
CDH7	39.7251	-2.26382	0.567224	-3.99105	6.5782e-05	0.0022047
CD1B	4.23449	1.82204	0.45517	4.00297	6.25511e-05	0.00214223
CD1C	20.0048	1.43442	0.293553	4.88642	1.02684e-06	0.00010081
MYH6	1.01598	2.5698	0.751524	3.41945	0.000627475	0.0114211
HHLA2	0.857737	2.04176	0.611222	3.34046	0.000836399	0.0137961
PTGDS	225.835	1.91895	0.301233	6.37031	1.88644e-10	1.77853e-07
NKG7	132.928	1.22639	0.310951	3.94398	8.01407e-05	0.00252525
CARD11	122.272	1.00769	0.229258	4.39544	1.10549e-05	0.000576974
STAP1	20.8268	1.64749	0.295839	5.56888	2.56386e-08	8.33388e-06
SEPT1	113.965	1.02835	0.233843	4.39761	1.09452e-05	0.00057389
BTNL8	2.16998	1.57079	0.561622	2.79689	0.00515978	0.0480645
TIFAB	11.2062	1.60902	0.329135	4.88864	1.01537e-06	0.000100603
GPA33	4.92089	1.07168	0.243245	4.40577	1.0541e-05	0.000554842
WDFY4	223.849	1.01123	0.218101	4.63652	3.5432e-06	0.000244587
INA	4.66752	2.69621	0.400238	6.73652	1.62223e-11	2.50472e-08
CLEC12A	17.9071	1.22271	0.275208	4.44287	8.87648e-06	0.000489475
SPOCK2	458.74	1.05973	0.239039	4.4333	9.28018e-06	0.000501387
GAD1	16.7294	-2.05224	0.431824	-4.75249	2.00931e-06	0.000164002
TNFRSF13B	6.27946	2.40724	0.412035	5.84232	5.14782e-09	2.38447e-06
BCL11B	99.521	1.26703	0.274509	4.61562	3.91918e-06	0.000260909
UBASH3A	29.5719	1.30202	0.303456	4.29065	1.78147e-05	0.000795351
DPY19L2	46.4651	-1.03638	0.306417	-3.38224	0.000718974	0.0124964
SAMD3	35.3162	1.28405	0.264377	4.8569	1.1924e-06	0.000112147
TNFRSF17	30.7379	1.72107	0.409254	4.20538	2.60649e-05	0.00107318
GPR18	18.4918	1.43758	0.262011	5.48674	4.09426e-08	1.06186e-05
LOC158696	4.4256	-1.20474	0.352453	-3.41816	0.000630468	0.0114635
IGJ	1856.4	1.08347	0.347355	3.1192	0.00181341	0.0235451
LETM2	132.179	-1.0347	0.254098	-4.07206	4.65992e-05	0.00171623
SIT1	44.6682	1.05459	0.299862	3.51692	0.000436593	0.00880217
BEND4	2.50234	2.06316	0.436297	4.72879	2.25864e-06	0.000177322
CXorf22	4.02604	1.27645	0.402655	3.17009	0.00152392	0.020807
ALB	514.067	-5.8755	0.571729	-10.2767	8.9728e-25	8.3124e-21
ABCA9	54.5078	1.15293	0.247227	4.66345	3.10949e-06	0.00022505
KIRREL3	1.80192	1.30954	0.382449	3.4241	0.00061684	0.0112896
PNMT	56.555	-1.75492	0.480054	-3.65567	0.000256507	0.00597055
NLGN4X	137.242	-1.18551	0.350099	-3.38621	0.000708652	0.0123867
NCR3	7.21561	1.59083	0.325029	4.8944	9.86042e-07	9.86393e-05
CD96	160.801	1.37334	0.265967	5.16357	2.42288e-07	3.67961e-05
CLEC10A	45.7589	1.63281	0.331888	4.91978	8.6642e-07	9.12104e-05
ITIH1	0.814995	1.65365	0.425698	3.88457	0.000102511	0.00299324
ITIH2	3.54141	2.10011	0.504776	4.16049	3.1757e-05	0.00126536
CST7	102.399	1.15405	0.248735	4.63965	3.49e-06	0.00024431
TRAT1	29.773	1.65329	0.314249	5.26108	1.43212e-07	2.55138e-05
C14orf34	0.839717	1.48014	0.460594	3.21354	0.0013111	0.018919
SLC13A5	1.60943	-1.33856	0.469403	-2.85162	0.00434965	0.0428672
FAM181B	8.44821	-1.77317	0.533687	-3.32249	0.000892175	0.0144621
MPP6	33.8168	1.00734	0.240369	4.19083	2.77938e-05	0.00113428
TNFRSF8	18.6174	1.09124	0.227869	4.7889	1.677e-06	0.000146564
LRTM2	55.6864	-2.2574	0.476282	-4.73962	2.14116e-06	0.000170872
GBP5	541.015	1.248	0.279581	4.46383	8.05073e-06	0.000450647
FRG2C	0.90475	2.79739	0.73332	3.81469	0.000136354	0.00369351
AGTR1	875.887	-1.97254	0.463158	-4.2589	2.05434e-05	0.000879048
NXNL2	24.0619	-1.20251	0.315154	-3.81564	0.000135831	0.00368474
SYN1	82.8361	-2.0512	0.361959	-5.66693	1.45376e-08	5.38705e-06
CD5	126.849	1.1777	0.257037	4.58184	4.60906e-06	0.000297222
CD6	159.225	1.24929	0.257164	4.85795	1.18609e-06	0.000112122
CD2	325.698	1.28156	0.258066	4.96604	6.83351e-07	7.81474e-05
CHRNB2	73.0395	-2.67434	0.425993	-6.2779	3.43178e-10	3.02781e-07
GABRB3	118.661	1.60648	0.457611	3.51059	0.000447121	0.00897536
STAB2	3.22833	1.21527	0.391731	3.1023	0.00192023	0.0244019
ZPLD1	35.4913	-1.53186	0.445345	-3.43972	0.000582315	0.0109091
LOC440925	25.131	-1.44644	0.387596	-3.73182	0.000190099	0.00474862
AGXT2L1	6.44283	-1.69513	0.510312	-3.32175	0.000894563	0.0144882
IKZF1	346.839	1.12107	0.194512	5.76354	8.23688e-09	3.42492e-06
ACAP1	118.735	1.54979	0.283384	5.46885	4.52957e-08	1.13411e-05
C8orf80	16.0728	1.81006	0.360708	5.01808	5.21912e-07	6.48992e-05
C8orf86	12.1152	-1.66826	0.420477	-3.96755	7.26157e-05	0.00237088
NPY5R	15.4518	-2.51615	0.609067	-4.13115	3.60947e-05	0.00139908
SELP	74.7233	1.00174	0.275986	3.6297	0.000283755	0.00643545
